# Supplementary material for: Comparative analysis of the alveolar microbiome in COPD, ECOPD, Sarcoidosis, and ILD patients to identify respiratory illnesses specific microbial signatures
Source: PubMed Central journal article supplement (PMC7889618; doi:10.1038/s41598-021-83524-2), 2021-02-17
Supplement: 41598_2021_83524_MOESM1_ESM.pdf [file 41598_2021_83524_MOESM1_ESM.pdf]

**Comparative analysis of the alveolar microbiome in COPD, ECOPD, Sarcoidosis, and ILD patients to identify respiratory illnesses specific microbial signatures**

Shashank Gupta<sup>1,6</sup>¶, Malini Shariff<sup>2</sup>¶, Gaura Chaturvedi<sup>3,4</sup>¶, Agrima Sharma<sup>2</sup>, Nitin Goel<sup>5</sup>, Monika Yadav<sup>6</sup>, Martin S. Mortensen<sup>1</sup>, Søren J. Sørensen<sup>1</sup>, Mitali Mukerji<sup>3</sup>, Nar Singh Chauhan<sup>6\*</sup>

¶ Authors have contributed equally

<sup>1</sup>Section of Microbiology, Department of Biology, University of Copenhagen, 2100 Copenhagen, Denmark

<sup>2</sup>Department of Microbiology, Vallabhbhai Patel Chest Institute, University of Delhi, Delhi-110007, India.

<sup>3</sup> Genomics and Molecular Medicine, CSIR-Institute of Genomics and Integrative Biology (CSIR-IGIB), South Campus, Sukhdev Vihar, Mathura Road, New Delhi- 110025, India

<sup>4</sup>Academy of Scientific and Innovative Research (AcSIR), Ghaziabad- 201002, India

<sup>5</sup>Department of Pulmonary Medicine, Vallabhbhai Patel Chest Institute, University of Delhi, Delhi-110007, India.

<sup>6</sup>Department of Biochemistry, Maharshi Dayanand University, Rohtak -124001, Haryana, India.

\*Corresponding Author

Email: [nschauhan@mdurohtak.ac.in](mailto:nschauhan@mdurohtak.ac.in)

**(A) Supplementary Tables**

**Supplementary Table S1:** Metadata of the patients with sarcoidosis enrolled in present study.

| Sample ID | Gender (M/F)* | AGE (Years) | Physiological Symptoms                                       | Clinical Investigations                                                                     | Diabetes | Heart disease | Others                                             |
|-----------|---------------|-------------|--------------------------------------------------------------|---------------------------------------------------------------------------------------------|----------|---------------|----------------------------------------------------|
| C12       | M             | 36          | Cough with sputum, Breathlessness, Repeated cold, Fever      | Granulomatous inflammation, Bilateral Hilar Lymphadenopathy- Stage 2                        | No       | No            | No Hypertension, No Irritable bowel syndrome (IBS) |
| C16       | M             | 65          | Cough Breathlessness, Repeated Cold                          | Granulomatous inflammation , Bilaterally symmetrical Hilar Lymphadenopathy                  | No       | No            | No information available                           |
| C23       | F             | 45          | Cough, Breathlessness, Pain in abdomen, Fever, Repeated Cold | Granulomatous inflammation , Bilateral Hilar Lymphadenopathy                                | No       | No            | No Hypertension, No Irritable bowel syndrome (IBS) |
| C27       | F             | 56          | Breathlessness, Cough                                        | Granulomatous inflammation, Bilaterally symmetrical Hilar Lymphadenopathy                   | No       | No            | No Hypertension, No Irritable bowel syndrome (IBS) |
| C32       | M             | 30          | Cough Breathlessness, Fever                                  | Granulomatous inflammation, Bilaterally symmetrical Hilar Lymphadenopathy                   | No       | No            | No Hypertension, No Irritable bowel syndrome (IBS) |
| C57       | M             | 42          | Breatlessness, Cheat Pain,                                   | Granulomatous inflammation, Bilateral Hilar Lymphadenopathy- Stage 1                        | No       | No            | No Hypertension, No Irritable bowel syndrome (IBS) |
| C62       | F             | 54          | Breatlessness, Chest Pain                                    | Granulomatous inflammation, Right Para tracheal and bilateral Hilar Lymphadenopathy -Stage1 | No       | No            | No Hypertension, No Irritable bowel syndrome (IBS) |
| C67       | M             | 28          | Breathlessness, Cough                                        | Granulomatous inflammation , Mediastinal lymphadenopathy                                    | No       | No            | No information available                           |

\* Here M: Male, F: Female.

**Supplementary Table S2:** Metadata of patients with interstitial lung disorder enrolled in present study.

| Sample ID | Age (Years) | Gender* (M/F) | Physiological symptoms                           | Pathological Investigations                                                                                                                     | Proposed Diagnosis                 | Diabetes | Heart disease | Others                                             |
|-----------|-------------|---------------|--------------------------------------------------|-------------------------------------------------------------------------------------------------------------------------------------------------|------------------------------------|----------|---------------|----------------------------------------------------|
| C3        | 35          | F             | Cough, breathlessness                            | Both lung fields show fibrosis and traction, Chronic interstitial thickening, Honey comb ground glass opacities                                 | Idiopathic pulmonary fibrosis      | No       | No            | No Hypertension, No irritable bowel syndrome (IBS) |
| C13       | 55          | F             | Cough with sputum, Breathlessness, Repeated cold | Bilateral lower lobe reticular opacities more on right side, Ectatic changes in all lobes of both lungs                                         | Respiratory bronchiolitis          | No       | No            | No Hypertension, No irritable bowel syndrome (IBS) |
| C14       | 52          | M             | Breathlessness, Cough                            | Bilateral lower lobe ground glass opacities and reticular shadows                                                                               | Nonspecific interstitial pneumonia | No       | No            | No Hypertension, No irritable bowel syndrome (IBS) |
| C19       | 55          | F             | Breathlessness, Cough, Fever, Wt Loss            | Patchy consolidation and multiple nodules in right upper and middle lobes and bilateral lower lobes, Subcentimetric Mediastinal lymphadenopathy | Nonspecific interstitial pneumonia | No       | No            | No Hypertension, No irritable bowel syndrome (IBS) |
| C21       | 65          | M             | Cough, Breathlessness                            | Bilateral cavities in upper lobes and centrilobular nodules                                                                                     | Respiratory bronchiolitis          | No       | No            | No Hypertension, No irritable bowel syndrome (IBS) |
| C50       | 44          | F             | Cough, breathlessness                            | Bilateral mid zone and lower zone non homogeneous opacities with areas of air bronchogram with right costophrenic angle blunting                | Unclassifiable ILD                 | No       | No            | No Hypertension, No irritable bowel syndrome (IBS) |
| C58       | 70          | M             | Breathlessness, Cough                            | Both lung fields show fibrosis and traction, Chronic interstitial thickening, honey comb ground glass opacities                                 | Idiopathic pulmonary fibrosis      | No       | No            | No Hypertension, No irritable bowel syndrome (IBS) |
| C64       | 52          | F             | Breathlessness, cough                            | Bilateral lower lobe ground glass opacities and reticular shadows                                                                               | Nonspecific interstitial pneumonia | No       | No            | No Hypertension, No irritable bowel syndrome (IBS) |

\* Here M: Male, F: Female.

**Supplementary Table S3:** Metadata of patients with COPD enrolled in present study.

| Sample ID | Gender | Smoker (Active:1; Inactive: 0) | Biomass Exposure (Yes: 1; No:0) | Diseases Diagnosis       | Other Information                                  |
|-----------|--------|--------------------------------|---------------------------------|--------------------------|----------------------------------------------------|
| T14       | M      | 0                              | NA                              | Stable COPD              | No Hypertension, No irritable bowel syndrome (IBS) |
| T18       | M      | 1                              | 0                               | Stable COPD              | No Hypertension, No irritable bowel syndrome (IBS) |
| T19       | M      | 1                              | 0                               | Stable COPD              | No Hypertension, No irritable bowel syndrome (IBS) |
| T20       | M      | 1                              | 0                               | Stable COPD              | No Hypertension, No irritable bowel syndrome (IBS) |
| T21       | M      | 0                              | NA                              | Stable COPD              | No information available                           |
| T22       | M      | 1                              | 0                               | Stable COPD              | No Hypertension, No irritable bowel syndrome (IBS) |
| T24       | M      | 1                              | 0                               | Stable COPD              | No Hypertension, No irritable bowel syndrome (IBS) |
| T27       | M      | 1                              | 0                               | Stable COPD              | No Hypertension, No irritable bowel syndrome (IBS) |
| T43       | M      | 1                              | 0                               | Stable COPD              | No Hypertension, No irritable bowel syndrome (IBS) |
| T45       | M      | 1                              | 0                               | Stable COPD              | No Hypertension, No irritable bowel syndrome (IBS) |
| T46       | M      | 1                              | 0                               | Stable COPD              | No Hypertension, No irritable bowel syndrome (IBS) |
| T47       | M      | 1                              | 0                               | Stable COPD              | No Hypertension, No irritable bowel syndrome (IBS) |
| T48       | M      | NA                             | NA                              | Stable COPD              | No information available                           |
| T49       | M      | 0                              | 0                               | Stable COPD              | No Hypertension, No irritable bowel syndrome (IBS) |
| T1        | F      | 0                              | 1                               | Exacerbated COPD (ECOPD) | No Hypertension, No irritable bowel syndrome (IBS) |
| T11       | F      | 0                              | 1                               | Exacerbated COPD (ECOPD) | No Hypertension, No irritable bowel syndrome (IBS) |
| T12       | M      | 1                              | 0                               | Exacerbated COPD (ECOPD) | No information available                           |
| T29       | M      | 1                              | 0                               | Exacerbated COPD (ECOPD) | No information available                           |
| T36       | M      | 0                              | 1                               | Exacerbated COPD (ECOPD) | No information available                           |
| T37       | M      | 1                              | 0                               | Exacerbated COPD (ECOPD) | No Hypertension, No irritable bowel syndrome (IBS) |
| T38       | M      | 1                              | NA                              | Exacerbated COPD (ECOPD) | No information available                           |
| T4        | M      | 1                              | 0                               | Exacerbated COPD (ECOPD) | No Hypertension, No irritable bowel syndrome (IBS) |
| T42       | M      | 1                              | 1                               | Exacerbated COPD (ECOPD) | No Hypertension, No irritable bowel syndrome (IBS) |
| T5        | M      | 0                              | NA                              | Exacerbated COPD (ECOPD) | No information available                           |
| T6        | M      | 1                              | 0                               | Exacerbated COPD (ECOPD) | No Hypertension, No irritable bowel syndrome (IBS) |
| T7        | M      | 1                              | 0                               | Exacerbated COPD (ECOPD) | No information available                           |
| T8        | F      | 0                              | 1                               | Exacerbated COPD (ECOPD) | No Hypertension, No irritable bowel syndrome (IBS) |

\* Here M: Male, F: Female.

**Supplementary Table S4:** List of bacteria at phylum level and their abundance observed by sequencing.

| Phylum                  | Diseases         | Abundance   |
|-------------------------|------------------|-------------|
| Acidobacteria           | Exacerbated COPD | 0.007071761 |
| Actinobacteria          | Exacerbated COPD | 4.946697    |
| Armatimonadetes         | Exacerbated COPD | 0.005303821 |
| Bacteroidetes           | Exacerbated COPD | 12.70265    |
| Chlamydiae              | Exacerbated COPD | 0.2581193   |
| Chloroflexi             | Exacerbated COPD | 0.01591146  |
| Cyanobacteria           | Exacerbated COPD | 0.178562    |
| Deinococcus-<br>Thermus | Exacerbated COPD | 0.005303821 |
| Epsilonbacteraeota      | Exacerbated COPD | 0.1237558   |
| Firmicutes              | Exacerbated COPD | 23.89371    |
| Fusobacteria            | Exacerbated COPD | 0.8715945   |
| Patescibacteria         | Exacerbated COPD | 0.07071761  |
| Planctomycetes          | Exacerbated COPD | 0.00353588  |
| Proteobacteria          | Exacerbated COPD | 56.53696    |
| Spirochaetes            | Exacerbated COPD | 0.1538108   |
| Synergistetes           | Exacerbated COPD | 0.007071761 |
| Tenericutes             | Exacerbated COPD | 0.07248555  |
| Verrucomicrobia         | Exacerbated COPD | 0.1202199   |
| WPS-2                   | Exacerbated COPD | 0           |
| Acidobacteria           | ILD              | 0.008618708 |
| Actinobacteria          | ILD              | 0.6751322   |
| Armatimonadetes         | ILD              | 0.008618708 |
| Bacteroidetes           | ILD              | 11.3336     |
| Chlamydiae              | ILD              | 0.2643071   |
| Chloroflexi             | ILD              | 0           |
| Cyanobacteria           | ILD              | 0.02585613  |
| Deinococcus-            | ILD              | 0.02872903  |

---

|                    |             |             |
|--------------------|-------------|-------------|
| Thermus            |             |             |
| Epsilonbacteraeota | ILD         | 0.2815445   |
| Firmicutes         | ILD         | 20.69639    |
| Fusobacteria       | ILD         | 0.6866238   |
| Patescibacteria    | ILD         | 0.2413238   |
| Planctomycetes     | ILD         | 0.008618708 |
| Proteobacteria     | ILD         | 65.71191    |
| Spirochaetes       | ILD         | 0.002872903 |
| Synergistetes      | ILD         | 0           |
| Tenericutes        | ILD         | 0           |
| Verrucomicrobia    | ILD         | 0           |
| WPS-2              | ILD         | 0           |
| Acidobacteria      | Stable COPD | 0.1625242   |
| Actinobacteria     | Stable COPD | 1.397052    |
| Armatimonadetes    | Stable COPD | 0.0476081   |
| Bacteroidetes      | Stable COPD | 17.96139    |
| Chlamydiae         | Stable COPD | 1.155728    |
| Chloroflexi        | Stable COPD | 0.008208294 |
| Cyanobacteria      | Stable COPD | 0.02626654  |
| Deinococcus-       |             |             |
| Thermus            | Stable COPD | 0           |
| Epsilonbacteraeota | Stable COPD | 0.216699    |
| Firmicutes         | Stable COPD | 17.42621    |
| Fusobacteria       | Stable COPD | 1.094986    |
| Patescibacteria    | Stable COPD | 0.4744394   |
| Planctomycetes     | Stable COPD | 0.01477493  |
| Proteobacteria     | Stable COPD | 59.67922    |
| Spirochaetes       | Stable COPD | 0.06566635  |
| Synergistetes      | Stable COPD | 0.01149161  |
| Tenericutes        | Stable COPD | 0.01313327  |
| Verrucomicrobia    | Stable COPD | 0.1674492   |

---

---

|                         |             |             |
|-------------------------|-------------|-------------|
| WPS-2                   | Stable COPD | 0.003283317 |
| Acidobacteria           | Sarcoidosis | 0.06320386  |
| Actinobacteria          | Sarcoidosis | 5.656746    |
| Armatimonadetes         | Sarcoidosis | 0.01149161  |
| Bacteroidetes           | Sarcoidosis | 17.78901    |
| Chlamydiae              | Sarcoidosis | 0.5831993   |
| Chloroflexi             | Sarcoidosis | 0           |
| Cyanobacteria           | Sarcoidosis | 0.005745806 |
| Deinococcus-<br>Thermus | Sarcoidosis | 0.01723742  |
| Epsilonbacteraeota      | Sarcoidosis | 0.1522638   |
| Firmicutes              | Sarcoidosis | 20.69352    |
| Fusobacteria            | Sarcoidosis | 1.887497    |
| Patescibacteria         | Sarcoidosis | 0.2011032   |
| Planctomycetes          | Sarcoidosis | 0.01149161  |
| Proteobacteria          | Sarcoidosis | 52.7781     |
| Spirochaetes            | Sarcoidosis | 0.07756838  |
| Synergistetes           | Sarcoidosis | 0.005745806 |
| Tenericutes             | Sarcoidosis | 0.04596644  |
| Verrucomicrobia         | Sarcoidosis | 0           |
| WPS-2                   | Sarcoidosis | 0           |

---

**Supplementary Table S5:** List of bacteria at family level and their abundance observed by sequencing.

| <b>Family</b>               | <b>Diseases</b>  | <b>Abundance</b> |
|-----------------------------|------------------|------------------|
| <i>Enterobacteriaceae</i>   | Exacerbated COPD | 19.52689921      |
| <i>Streptococcaceae</i>     | Exacerbated COPD | 11.68785248      |
| <i>Prevotellaceae</i>       | Exacerbated COPD | 8.022912505      |
| <i>Pseudomonadaceae</i>     | Exacerbated COPD | 7.957498718      |
| <i>Pasteurellaceae</i>      | Exacerbated COPD | 7.814295564      |
| <i>Burkholderiaceae</i>     | Exacerbated COPD | 4.838852253      |
| <i>Reyranellaceae</i>       | Exacerbated COPD | 4.798189629      |
| <i>Neisseriaceae</i>        | Exacerbated COPD | 4.532998603      |
| <i>Ruminococcaceae</i>      | Exacerbated COPD | 4.357972526      |
| <i>Micrococcaceae</i>       | Exacerbated COPD | 3.98670509       |
| <i>Xanthobacteraceae</i>    | Exacerbated COPD | 2.975443311      |
| <i>Lachnospiraceae</i>      | Exacerbated COPD | 2.584728533      |
| <i>Rhizobiaceae</i>         | Exacerbated COPD | 2.201085515      |
| <i>Veillonellaceae</i>      | Exacerbated COPD | 1.382529215      |
| <i>Weeksellaceae</i>        | Exacerbated COPD | 1.235790181      |
| <i>Porphyromonadaceae</i>   | Exacerbated COPD | 1.053692343      |
| <i>Lactobacillaceae</i>     | Exacerbated COPD | 0.935240351      |
| <i>Xanthomonadaceae</i>     | Exacerbated COPD | 0.869826565      |
| <i>Staphylococcaceae</i>    | Exacerbated COPD | 0.827396001      |
| <i>Carnobacteriaceae</i>    | Exacerbated COPD | 0.783197497      |
| <i>Fusobacteriaceae</i>     | Exacerbated COPD | 0.698336368      |
| <i>Sphingobacteriaceae</i>  | Exacerbated COPD | 0.655905804      |
| <i>Bacteroidaceae</i>       | Exacerbated COPD | 0.565740855      |
| <i>Actinomycetaceae</i>     | Exacerbated COPD | 0.486183548      |
| <i>Flavobacteriaceae</i>    | Exacerbated COPD | 0.419001821      |
| <i>Sphingomonadaceae</i>    | Exacerbated COPD | 0.415465941      |
| <i>Bacillales_Family_XI</i> | Exacerbated COPD | 0.339444513      |
| <i>Erysipelotrichaceae</i>  | Exacerbated COPD | 0.327068932      |



---

|                                      |                  |             |
|--------------------------------------|------------------|-------------|
| <i>Simkaniaceae</i>                  | Exacerbated COPD | 0.258119265 |
| <i>Christensenellaceae</i>           | Exacerbated COPD | 0.249279564 |
| <i>Rikenellaceae</i>                 | Exacerbated COPD | 0.228064282 |
| <i>Tannerellaceae</i>                | Exacerbated COPD | 0.190937539 |
| <i>Leptotrichiaceae</i>              | Exacerbated COPD | 0.173258137 |
| <i>Coriobacteriaceae</i>             | Exacerbated COPD | 0.160882556 |
| <i>Barnesiellaceae</i>               | Exacerbated COPD | 0.159114616 |
| <i>Spirochaetaceae</i>               | Exacerbated COPD | 0.153810795 |
| <i>Campylobacteraceae</i>            | Exacerbated COPD | 0.123755812 |
| <i>Bifidobacteriaceae</i>            | Exacerbated COPD | 0.120219932 |
| <i>Peptostreptococcaceae</i>         | Exacerbated COPD | 0.113148171 |
| <i>Akkermansiaceae</i>               | Exacerbated COPD | 0.10607641  |
| <i>Clostridiales_vadinBB60_group</i> | Exacerbated COPD | 0.10077259  |
| <i>Moraxellaceae</i>                 | Exacerbated COPD | 0.09723671  |
| <i>Hyphomicrobiaceae</i>             | Exacerbated COPD | 0.072485547 |
| <i>Succinivibrionaceae</i>           | Exacerbated COPD | 0.072485547 |
| <i>Beijerinckiaceae</i>              | Exacerbated COPD | 0.068949667 |
| <i>Clostridiales_Family_XIII</i>     | Exacerbated COPD | 0.068949667 |
| <i>Corynebacteriaceae</i>            | Exacerbated COPD | 0.061877906 |
| <i>Rhodocyclaceae</i>                | Exacerbated COPD | 0.058342026 |
| <i>Azospirillaceae</i>               | Exacerbated COPD | 0.056574086 |
| <i>Chitinophagaceae</i>              | Exacerbated COPD | 0.047734385 |
| <i>Mycoplasmataceae</i>              | Exacerbated COPD | 0.047734385 |
| <i>Acidaminococcaceae</i>            | Exacerbated COPD | 0.045966444 |
| <i>Lentimicrobiaceae</i>             | Exacerbated COPD | 0.044198504 |
| <i>Atopobiaceae</i>                  | Exacerbated COPD | 0.038894684 |
| <i>Caulobacteraceae</i>              | Exacerbated COPD | 0.037126744 |
| <i>Eggerthellaceae</i>               | Exacerbated COPD | 0.037126744 |
| <i>Muribaculaceae</i>                | Exacerbated COPD | 0.033590863 |
| <i>Aerococcaceae</i>                 | Exacerbated COPD | 0.030054983 |
| <i>Rhizobiales_Incertae_Sedis</i>    | Exacerbated COPD | 0.030054983 |

---

---

|                                       |                  |             |
|---------------------------------------|------------------|-------------|
| <i>Mycobacteriaceae</i>               | Exacerbated COPD | 0.022983222 |
| <i>Bacillaceae</i>                    | Exacerbated COPD | 0.021215282 |
| <i>Marinifilaceae</i>                 | Exacerbated COPD | 0.017679402 |
| <i>Thermomicrobiales_JG30_KF_CM45</i> | Exacerbated COPD | 0.015911462 |
| <i>Devosiaceae</i>                    | Exacerbated COPD | 0.014143521 |
| <i>Chthoniobacteraceae</i>            | Exacerbated COPD | 0.012375581 |
| <i>Rhodanobacteraceae</i>             | Exacerbated COPD | 0.012375581 |
| <i>Streptomycetaceae</i>              | Exacerbated COPD | 0.012375581 |
| <i>Rhodobacteraceae</i>               | Exacerbated COPD | 0.010607641 |
| <i>Propionibacteriaceae</i>           | Exacerbated COPD | 0.008839701 |
| <i>Saccharimonadaceae</i>             | Exacerbated COPD | 0.008839701 |
| <i>Cardiobacteriaceae</i>             | Exacerbated COPD | 0.007071761 |
| <i>Halomonadaceae</i>                 | Exacerbated COPD | 0.007071761 |
| <i>Solibacteraceae_Subgroup_3_</i>    | Exacerbated COPD | 0.007071761 |
| <i>Synergistaceae</i>                 | Exacerbated COPD | 0.007071761 |
| <i>Bacteriovoracaceae</i>             | Exacerbated COPD | 0.005303821 |
| <i>Clostridiales_Family_XI</i>        | Exacerbated COPD | 0.005303821 |
| <i>Fimbriimonadaceae</i>              | Exacerbated COPD | 0.005303821 |
| <i>Hydrogenophilaceae</i>             | Exacerbated COPD | 0.005303821 |
| <i>Microbacteriaceae</i>              | Exacerbated COPD | 0.005303821 |
| <i>Paludibacteraceae</i>              | Exacerbated COPD | 0.005303821 |
| <i>Thermaceae</i>                     | Exacerbated COPD | 0.005303821 |
| <i>Alteromonadaceae</i>               | Exacerbated COPD | 0.00353588  |
| <i>Hymenobacteraceae</i>              | Exacerbated COPD | 0.00353588  |
| <i>Peptococcaceae</i>                 | Exacerbated COPD | 0.00353588  |
| <i>Pirellulaceae</i>                  | Exacerbated COPD | 0.00353588  |
| <i>Dermabacteraceae</i>               | Exacerbated COPD | 0.00176794  |
| <i>Desulfovibrionaceae</i>            | Exacerbated COPD | 0.00176794  |
| <i>Geodermatophilaceae</i>            | Exacerbated COPD | 0.00176794  |
| <i>Leuconostocaceae</i>               | Exacerbated COPD | 0.00176794  |
| <i>Nocardiaceae</i>                   | Exacerbated COPD | 0.00176794  |

---

---

|                                                     |                  |            |
|-----------------------------------------------------|------------------|------------|
| <i>Opitutaceae</i>                                  | Exacerbated COPD | 0.00176794 |
| <i>Acetobacteraceae</i>                             | Exacerbated COPD | 0          |
| <i>Aeromonadaceae</i>                               | Exacerbated COPD | 0          |
| <i>Anaerolineaceae</i>                              | Exacerbated COPD | 0          |
| <i>Anaeroplasmataceae</i>                           | Exacerbated COPD | 0          |
| <i>Bacillales_Family_XII</i>                        | Exacerbated COPD | 0          |
| <i>Bacteroidales_F082</i>                           | Exacerbated COPD | 0          |
| <i>Betaproteobacteriales_TRA3_20</i>                | Exacerbated COPD | 0          |
| <i>Blastocatellaceae</i>                            | Exacerbated COPD | 0          |
| <i>Candidatus_Saccharibacteria_bacterium_UB2523</i> | Exacerbated COPD | 0          |
| <i>Cellvibrionaceae</i>                             | Exacerbated COPD | 0          |
| <i>Chlamydiales_cvE6</i>                            | Exacerbated COPD | 0          |
| <i>Chromobacteriaceae</i>                           | Exacerbated COPD | 0          |
| <i>Coriobacteriales_Incertae_Sedis</i>              | Exacerbated COPD | 0          |
| <i>Coxiellaceae</i>                                 | Exacerbated COPD | 0          |
| <i>Enterococcaceae</i>                              | Exacerbated COPD | 0          |
| <i>Geminicoccaceae</i>                              | Exacerbated COPD | 0          |
| <i>Gemmataceae</i>                                  | Exacerbated COPD | 0          |
| <i>Ilumatobacteraceae</i>                           | Exacerbated COPD | 0          |
| <i>Intrasporangiaceae</i>                           | Exacerbated COPD | 0          |
| <i>Kaistiaceae</i>                                  | Exacerbated COPD | 0          |
| <i>Legionellaceae</i>                               | Exacerbated COPD | 0          |
| <i>Listeriaceae</i>                                 | Exacerbated COPD | 0          |
| <i>Nocardioidaceae</i>                              | Exacerbated COPD | 0          |
| <i>Oligoflexales_0319_6G20</i>                      | Exacerbated COPD | 0          |
| <i>Paenibacillaceae</i>                             | Exacerbated COPD | 0          |
| <i>Parvibaculaceae</i>                              | Exacerbated COPD | 0          |
| <i>Planococcaceae</i>                               | Exacerbated COPD | 0          |
| <i>Pseudonocardiaceae</i>                           | Exacerbated COPD | 0          |
| <i>Rickettsiaceae</i>                               | Exacerbated COPD | 0          |
| <i>Rubinisphaeraceae</i>                            | Exacerbated COPD | 0          |

---

---

|                                                |                  |             |
|------------------------------------------------|------------------|-------------|
| <i>Sneathiellaceae</i>                         | Exacerbated COPD | 0           |
| <i>Sphingobacteriales_NS11_12_marine_group</i> | Exacerbated COPD | 0           |
| <i>Thermoactinomycetaceae</i>                  | Exacerbated COPD | 0           |
| <i>Enterobacteriaceae</i>                      | ILD              | 22.98034934 |
| <i>Pasteurellaceae</i>                         | ILD              | 15.35853827 |
| <i>Prevotellaceae</i>                          | ILD              | 8.296943231 |
| <i>Staphylococcaceae</i>                       | ILD              | 7.774074925 |
| <i>Streptococcaceae</i>                        | ILD              | 7.343139508 |
| <i>Pseudomonadaceae</i>                        | ILD              | 6.613422202 |
| <i>Reyranellaceae</i>                          | ILD              | 6.357733854 |
| <i>Burkholderiaceae</i>                        | ILD              | 5.639508159 |
| <i>Xanthobacteraceae</i>                       | ILD              | 3.335440129 |
| <i>Veillonellaceae</i>                         | ILD              | 3.145828545 |
| <i>Rhizobiaceae</i>                            | ILD              | 1.990921627 |
| <i>Xanthomonadaceae</i>                        | ILD              | 1.192254654 |
| <i>Neisseriaceae</i>                           | ILD              | 1.091703057 |
| <i>Porphyromonadaceae</i>                      | ILD              | 0.973914043 |
| <i>Weeksellaceae</i>                           | ILD              | 0.922201793 |
| <i>Ruminococcaceae</i>                         | ILD              | 0.781429556 |
| <i>Sphingobacteriaceae</i>                     | ILD              | 0.76419214  |
| <i>Lachnospiraceae</i>                         | ILD              | 0.634911515 |
| <i>Fusobacteriaceae</i>                        | ILD              | 0.476901862 |
| <i>Sphingomonadaceae</i>                       | ILD              | 0.43380832  |
| <i>Campylobacteraceae</i>                      | ILD              | 0.281544473 |
| <i>Carnobacteriaceae</i>                       | ILD              | 0.281544473 |
| <i>Micrococcaceae</i>                          | ILD              | 0.267179959 |
| <i>Simkaniaceae</i>                            | ILD              | 0.264307056 |
| <i>Saccharimonadaceae</i>                      | ILD              | 0.22695932  |
| <i>Leptotrichiaceae</i>                        | ILD              | 0.209721903 |
| <i>Moraxellaceae</i>                           | ILD              | 0.195357389 |
| <i>Erysipelotrichaceae</i>                     | ILD              | 0.192484486 |

---

---

|                                   |     |             |
|-----------------------------------|-----|-------------|
| <i>Bacillales_Family_XI</i>       | ILD | 0.149390945 |
| <i>Flavobacteriaceae</i>          | ILD | 0.12353482  |
| <i>Bacillaceae</i>                | ILD | 0.112043208 |
| <i>Tannerellaceae</i>             | ILD | 0.112043208 |
| <i>Actinomycetaceae</i>           | ILD | 0.106297403 |
| <i>Hyphomicrobiaceae</i>          | ILD | 0.106297403 |
| <i>Azospirillaceae</i>            | ILD | 0.1034245   |
| <i>Bacteroidaceae</i>             | ILD | 0.091932889 |
| <i>Caulobacteraceae</i>           | ILD | 0.091932889 |
| <i>Coriobacteriaceae</i>          | ILD | 0.086187083 |
| <i>Beijerinckiaceae</i>           | ILD | 0.074695472 |
| <i>Corynebacteriaceae</i>         | ILD | 0.074695472 |
| <i>Bifidobacteriaceae</i>         | ILD | 0.057458056 |
| <i>Atopobiaceae</i>               | ILD | 0.054585153 |
| <i>Christensenellaceae</i>        | ILD | 0.045966444 |
| <i>Acidaminococcaceae</i>         | ILD | 0.040220639 |
| <i>Clostridiales_Family_XIII</i>  | ILD | 0.040220639 |
| <i>Peptostreptococcaceae</i>      | ILD | 0.034474833 |
| <i>Clostridiales_Family_XI</i>    | ILD | 0.028729028 |
| <i>Succinivibrionaceae</i>        | ILD | 0.028729028 |
| <i>Thermaceae</i>                 | ILD | 0.028729028 |
| <i>Aerococcaceae</i>              | ILD | 0.025856125 |
| <i>Paludibacteraceae</i>          | ILD | 0.025856125 |
| <i>Bacteriovoracaceae</i>         | ILD | 0.022983222 |
| <i>Mycobacteriaceae</i>           | ILD | 0.022983222 |
| <i>Planococcaceae</i>             | ILD | 0.020110319 |
| <i>Rhodocyclaceae</i>             | ILD | 0.020110319 |
| <i>Rhodanobacteraceae</i>         | ILD | 0.017237417 |
| <i>Rhizobiales_Incertae_Sedis</i> | ILD | 0.014364514 |
| <i>Lactobacillaceae</i>           | ILD | 0.011491611 |
| <i>Enterococcaceae</i>            | ILD | 0.008618708 |

---

---

|                                                     |     |             |
|-----------------------------------------------------|-----|-------------|
| <i>Fimbriimonadaceae</i>                            | ILD | 0.008618708 |
| <i>Lentimicrobiaceae</i>                            | ILD | 0.008618708 |
| <i>Pirellulaceae</i>                                | ILD | 0.008618708 |
| <i>Solibacteraceae_Subgroup_3_</i>                  | ILD | 0.008618708 |
| <i>Barnesiellaceae</i>                              | ILD | 0.005745806 |
| <i>Chitinophagaceae</i>                             | ILD | 0.005745806 |
| <i>Propionibacteriaceae</i>                         | ILD | 0.005745806 |
| <i>Thermoactinomycetaceae</i>                       | ILD | 0.005745806 |
| <i>Coxiellaceae</i>                                 | ILD | 0.002872903 |
| <i>Spirochaetaceae</i>                              | ILD | 0.002872903 |
| <i>Acetobacteraceae</i>                             | ILD | 0           |
| <i>Aeromonadaceae</i>                               | ILD | 0           |
| <i>Akkermansiaceae</i>                              | ILD | 0           |
| <i>Alteromonadaceae</i>                             | ILD | 0           |
| <i>Anaerolineaceae</i>                              | ILD | 0           |
| <i>Anaeroplasmataceae</i>                           | ILD | 0           |
| <i>Bacillales_Family_XII</i>                        | ILD | 0           |
| <i>Bacteroidales_F082</i>                           | ILD | 0           |
| <i>Betaproteobacteriales_TRA3_20</i>                | ILD | 0           |
| <i>Blastocatellaceae</i>                            | ILD | 0           |
| <i>Candidatus_Saccharibacteria_bacterium_UB2523</i> | ILD | 0           |
| <i>Cardiobacteriaceae</i>                           | ILD | 0           |
| <i>Cellvibrionaceae</i>                             | ILD | 0           |
| <i>Chlamydiales_cvE6</i>                            | ILD | 0           |
| <i>Chromobacteriaceae</i>                           | ILD | 0           |
| <i>Chthoniobacteraceae</i>                          | ILD | 0           |
| <i>Clostridiales_vadinBB60_group</i>                | ILD | 0           |
| <i>Coriobacteriales_Incertae_Sedis</i>              | ILD | 0           |
| <i>Dermabacteraceae</i>                             | ILD | 0           |
| <i>Desulfovibrionaceae</i>                          | ILD | 0           |
| <i>Devosiaceae</i>                                  | ILD | 0           |

---

---

|                                                |     |   |
|------------------------------------------------|-----|---|
| <i>Eggerthellaceae</i>                         | ILD | 0 |
| <i>Geminicoccaceae</i>                         | ILD | 0 |
| <i>Gemmataceae</i>                             | ILD | 0 |
| <i>Geodermatophilaceae</i>                     | ILD | 0 |
| <i>Halomonadaceae</i>                          | ILD | 0 |
| <i>Hydrogenophilaceae</i>                      | ILD | 0 |
| <i>Hymenobacteraceae</i>                       | ILD | 0 |
| <i>Ilumatobacteraceae</i>                      | ILD | 0 |
| <i>Intrasporangiaceae</i>                      | ILD | 0 |
| <i>Kaistiaceae</i>                             | ILD | 0 |
| <i>Legionellaceae</i>                          | ILD | 0 |
| <i>Leuconostocaceae</i>                        | ILD | 0 |
| <i>Listeriaceae</i>                            | ILD | 0 |
| <i>Marinifilaceae</i>                          | ILD | 0 |
| <i>Microbacteriaceae</i>                       | ILD | 0 |
| <i>Muribaculaceae</i>                          | ILD | 0 |
| <i>Mycoplasmataceae</i>                        | ILD | 0 |
| <i>Nocardiaceae</i>                            | ILD | 0 |
| <i>Nocardoidaceae</i>                          | ILD | 0 |
| <i>Oligoflexales_0319_6G20</i>                 | ILD | 0 |
| <i>Opitutaceae</i>                             | ILD | 0 |
| <i>Paenibacillaceae</i>                        | ILD | 0 |
| <i>Parvibaculaceae</i>                         | ILD | 0 |
| <i>Peptococcaceae</i>                          | ILD | 0 |
| <i>Pseudonocardiaceae</i>                      | ILD | 0 |
| <i>Rhodobacteraceae</i>                        | ILD | 0 |
| <i>Rickettsiaceae</i>                          | ILD | 0 |
| <i>Rikenellaceae</i>                           | ILD | 0 |
| <i>Rubinisphaeraceae</i>                       | ILD | 0 |
| <i>Sneathiellaceae</i>                         | ILD | 0 |
| <i>Sphingobacteriales_NS11_12_marine_group</i> | ILD | 0 |

---

---

|                                       |             |             |
|---------------------------------------|-------------|-------------|
| <i>Streptomycetaceae</i>              | ILD         | 0           |
| <i>Synergistaceae</i>                 | ILD         | 0           |
| <i>Thermomicrobiales_JG30_KF_CM45</i> | ILD         | 0           |
| <i>Pasteurellaceae</i>                | Stable COPD | 12.6062974  |
| <i>Reyranellaceae</i>                 | Stable COPD | 11.90038415 |
| <i>Prevotellaceae</i>                 | Stable COPD | 10.91703057 |
| <i>Burkholderiaceae</i>               | Stable COPD | 10.0962012  |
| <i>Enterobacteriaceae</i>             | Stable COPD | 9.613553534 |
| <i>Veillonellaceae</i>                | Stable COPD | 5.407623863 |
| <i>Streptococcaceae</i>               | Stable COPD | 3.798798306 |
| <i>Ruminococcaceae</i>                | Stable COPD | 3.65104902  |
| <i>Pseudomonadaceae</i>               | Stable COPD | 3.168401353 |
| <i>Neisseriaceae</i>                  | Stable COPD | 3.048560265 |
| <i>Xanthobacteraceae</i>              | Stable COPD | 2.97796894  |
| <i>Lachnospiraceae</i>                | Stable COPD | 2.60202909  |
| <i>Rhizobiaceae</i>                   | Stable COPD | 2.176839479 |
| <i>Porphyromonadaceae</i>             | Stable COPD | 2.12266474  |
| <i>Moraxellaceae</i>                  | Stable COPD | 1.761499819 |
| <i>Weeksellaceae</i>                  | Stable COPD | 1.620317168 |
| <i>Simkaniaceae</i>                   | Stable COPD | 1.137669501 |
| <i>Flavobacteriaceae</i>              | Stable COPD | 0.86679581  |
| <i>Fusobacteriaceae</i>               | Stable COPD | 0.817546049 |
| <i>Bacteroidaceae</i>                 | Stable COPD | 0.689496667 |
| <i>Sphingobacteriaceae</i>            | Stable COPD | 0.669796763 |
| <i>Sphingomonadaceae</i>              | Stable COPD | 0.628755294 |
| <i>Chitinophagaceae</i>               | Stable COPD | 0.525330794 |
| <i>Xanthomonadaceae</i>               | Stable COPD | 0.525330794 |
| <i>Erysipelotrichaceae</i>            | Stable COPD | 0.472797715 |
| <i>Micrococcaceae</i>                 | Stable COPD | 0.338181699 |
| <i>Azospirillaceae</i>                | Stable COPD | 0.311915159 |
| <i>Carnobacteriaceae</i>              | Stable COPD | 0.293856913 |

---



---

|                                    |             |             |
|------------------------------------|-------------|-------------|
| <i>Leptotrichiaceae</i>            | Stable COPD | 0.277440326 |
| <i>Christensenellaceae</i>         | Stable COPD | 0.252815445 |
| <i>Staphylococcaceae</i>           | Stable COPD | 0.239682175 |
| <i>Tannerellaceae</i>              | Stable COPD | 0.221623929 |
| <i>Campylobacteraceae</i>          | Stable COPD | 0.216698953 |
| <i>Bacillales_Family_XI</i>        | Stable COPD | 0.200282365 |
| <i>Coriobacteriaceae</i>           | Stable COPD | 0.196999048 |
| <i>Akkermansiaceae</i>             | Stable COPD | 0.167449191 |
| <i>Mycobacteriaceae</i>            | Stable COPD | 0.162524214 |
| <i>Solibacteraceae_Subgroup_3_</i> | Stable COPD | 0.162524214 |
| <i>Corynebacteriaceae</i>          | Stable COPD | 0.160882556 |
| <i>Actinomycetaceae</i>            | Stable COPD | 0.141182651 |
| <i>Bifidobacteriaceae</i>          | Stable COPD | 0.12969104  |
| <i>Saccharimonadaceae</i>          | Stable COPD | 0.123124405 |
| <i>Atopobiaceae</i>                | Stable COPD | 0.119841087 |
| <i>Lactobacillaceae</i>            | Stable COPD | 0.118199429 |
| <i>Hyphomicrobiaceae</i>           | Stable COPD | 0.113274453 |
| <i>Rikenellaceae</i>               | Stable COPD | 0.109991135 |
| <i>Succinivibrionaceae</i>         | Stable COPD | 0.105066159 |
| <i>Acidaminococcaceae</i>          | Stable COPD | 0.100141183 |
| <i>Rhizobiales_Incertae_Sedis</i>  | Stable COPD | 0.088649572 |
| <i>Beijerinckiaceae</i>            | Stable COPD | 0.070591325 |
| <i>Peptostreptococcaceae</i>       | Stable COPD | 0.068949667 |
| <i>Caulobacteraceae</i>            | Stable COPD | 0.065666349 |
| <i>Spirochaetaceae</i>             | Stable COPD | 0.065666349 |
| <i>Muribaculaceae</i>              | Stable COPD | 0.060741373 |
| <i>Eggerthellaceae</i>             | Stable COPD | 0.059099714 |
| <i>Clostridiales_Family_XIII</i>   | Stable COPD | 0.049249762 |
| <i>Fimbriimonadaceae</i>           | Stable COPD | 0.047608103 |
| <i>Clostridiales_Family_XI</i>     | Stable COPD | 0.034474833 |
| <i>Legionellaceae</i>              | Stable COPD | 0.032833175 |

---

---

|                                                     |             |             |
|-----------------------------------------------------|-------------|-------------|
| <i>Paludibacteraceae</i>                            | Stable COPD | 0.031191516 |
| <i>Aerococcaceae</i>                                | Stable COPD | 0.029549857 |
| <i>Propionibacteriaceae</i>                         | Stable COPD | 0.029549857 |
| <i>Rhodocyclaceae</i>                               | Stable COPD | 0.027908198 |
| <i>Clostridiales_vadinBB60_group</i>                | Stable COPD | 0.02626654  |
| <i>Bacillales_Family_XII</i>                        | Stable COPD | 0.024624881 |
| <i>Lentimicrobiaceae</i>                            | Stable COPD | 0.024624881 |
| <i>Paenibacillaceae</i>                             | Stable COPD | 0.022983222 |
| <i>Alteromonadaceae</i>                             | Stable COPD | 0.021341564 |
| <i>Rhodanobacteraceae</i>                           | Stable COPD | 0.021341564 |
| <i>Marinifilaceae</i>                               | Stable COPD | 0.019699905 |
| <i>Rhodobacteraceae</i>                             | Stable COPD | 0.019699905 |
| <i>Chlamydiales_cvE6</i>                            | Stable COPD | 0.018058246 |
| <i>Parvibaculaceae</i>                              | Stable COPD | 0.018058246 |
| <i>Intrasporangiaceae</i>                           | Stable COPD | 0.016416587 |
| <i>Aeromonadaceae</i>                               | Stable COPD | 0.011491611 |
| <i>Bacillaceae</i>                                  | Stable COPD | 0.011491611 |
| <i>Barnesiellaceae</i>                              | Stable COPD | 0.011491611 |
| <i>Chromobacteriaceae</i>                           | Stable COPD | 0.011491611 |
| <i>Hymenobacteraceae</i>                            | Stable COPD | 0.011491611 |
| <i>Pirellulaceae</i>                                | Stable COPD | 0.011491611 |
| <i>Synergistaceae</i>                               | Stable COPD | 0.011491611 |
| <i>Coriobacteriales_Incertae_Sedis</i>              | Stable COPD | 0.009849952 |
| <i>Devosiaceae</i>                                  | Stable COPD | 0.009849952 |
| <i>Mycoplasmataceae</i>                             | Stable COPD | 0.009849952 |
| <i>Nocardiaceae</i>                                 | Stable COPD | 0.009849952 |
| <i>Bacteriovoracaceae</i>                           | Stable COPD | 0.008208294 |
| <i>Microbacteriaceae</i>                            | Stable COPD | 0.008208294 |
| <i>Candidatus_Saccharibacteria_bacterium_UB2523</i> | Stable COPD | 0.006566635 |
| <i>Cellvibrionaceae</i>                             | Stable COPD | 0.006566635 |
| <i>Peptococcaceae</i>                               | Stable COPD | 0.006566635 |

---

|                                                |             |             |
|------------------------------------------------|-------------|-------------|
| <i>Thermomicrobiales_JG30_KF_CM45</i>          | Stable COPD | 0.006566635 |
| <i>Leuconostocaceae</i>                        | Stable COPD | 0.004924976 |
| <i>Sphingobacteriales_NS11_12_marine_group</i> | Stable COPD | 0.004924976 |
| <i>Streptomycetaceae</i>                       | Stable COPD | 0.004924976 |
| <i>Anaeroplasmataceae</i>                      | Stable COPD | 0.003283317 |
| <i>Betaproteobacteriales_TRA3_20</i>           | Stable COPD | 0.003283317 |
| <i>Cardiobacteriaceae</i>                      | Stable COPD | 0.003283317 |
| <i>Halomonadaceae</i>                          | Stable COPD | 0.003283317 |
| <i>Ilumatobacteraceae</i>                      | Stable COPD | 0.003283317 |
| <i>Oligoflexales_0319_6G20</i>                 | Stable COPD | 0.003283317 |
| <i>Pseudonocardiaceae</i>                      | Stable COPD | 0.003283317 |
| <i>Rubinisphaeraceae</i>                       | Stable COPD | 0.003283317 |
| <i>Acetobacteraceae</i>                        | Stable COPD | 0.001641659 |
| <i>Anaerolineaceae</i>                         | Stable COPD | 0.001641659 |
| <i>Bacteroidales_F082</i>                      | Stable COPD | 0.001641659 |
| <i>Coxiellaceae</i>                            | Stable COPD | 0.001641659 |
| <i>Listeriaceae</i>                            | Stable COPD | 0.001641659 |
| <i>Nocardioidaceae</i>                         | Stable COPD | 0.001641659 |
| <i>Rickettsiaceae</i>                          | Stable COPD | 0.001641659 |
| <i>Sneathiellaceae</i>                         | Stable COPD | 0.001641659 |
| <i>Blastocatellaceae</i>                       | Stable COPD | 0           |
| <i>Chthoniobacteraceae</i>                     | Stable COPD | 0           |
| <i>Dermabacteraceae</i>                        | Stable COPD | 0           |
| <i>Desulfovibrionaceae</i>                     | Stable COPD | 0           |
| <i>Enterococcaceae</i>                         | Stable COPD | 0           |
| <i>Geminicoccaceae</i>                         | Stable COPD | 0           |
| <i>Gemmataceae</i>                             | Stable COPD | 0           |
| <i>Geodermatophilaceae</i>                     | Stable COPD | 0           |
| <i>Hydrogenophilaceae</i>                      | Stable COPD | 0           |
| <i>Kaistiaceae</i>                             | Stable COPD | 0           |
| <i>Opitutaceae</i>                             | Stable COPD | 0           |

---

|                               |             |             |
|-------------------------------|-------------|-------------|
| <i>Planococcaceae</i>         | Stable COPD | 0           |
| <i>Thermaceae</i>             | Stable COPD | 0           |
| <i>Thermoactinomycetaceae</i> | Stable COPD | 0           |
| <i>Prevotellaceae</i>         | Sarcoidosis | 13.4250747  |
| <i>Burkholderiaceae</i>       | Sarcoidosis | 12.09204781 |
| <i>Streptococcaceae</i>       | Sarcoidosis | 11.33647437 |
| <i>Enterobacteriaceae</i>     | Sarcoidosis | 10.14421972 |
| <i>Reyranellaceae</i>         | Sarcoidosis | 8.624454148 |
| <i>Neisseriaceae</i>          | Sarcoidosis | 5.616524937 |
| <i>Xanthobacteraceae</i>      | Sarcoidosis | 5.240174672 |
| <i>Micrococcaceae</i>         | Sarcoidosis | 4.677085727 |
| <i>Veillonellaceae</i>        | Sarcoidosis | 4.521948977 |
| <i>Rhizobiaceae</i>           | Sarcoidosis | 3.562399448 |
| <i>Pasteurellaceae</i>        | Sarcoidosis | 3.160193059 |
| <i>Carnobacteriaceae</i>      | Sarcoidosis | 2.378763503 |
| <i>Porphyromonadaceae</i>     | Sarcoidosis | 1.669156516 |
| <i>Xanthomonadaceae</i>       | Sarcoidosis | 1.335899793 |
| <i>Fusobacteriaceae</i>       | Sarcoidosis | 1.289933349 |
| <i>Sphingomonadaceae</i>      | Sarcoidosis | 1.028499196 |
| <i>Weeksellaceae</i>          | Sarcoidosis | 0.985405654 |
| <i>Pseudomonadaceae</i>       | Sarcoidosis | 0.942312112 |
| <i>Sphingobacteriaceae</i>    | Sarcoidosis | 0.864743737 |
| <i>Staphylococcaceae</i>      | Sarcoidosis | 0.680877959 |
| <i>Flavobacteriaceae</i>      | Sarcoidosis | 0.675132154 |
| <i>Leptotrichiaceae</i>       | Sarcoidosis | 0.597563778 |
| <i>Simkaniaceae</i>           | Sarcoidosis | 0.580326362 |
| <i>Lachnospiraceae</i>        | Sarcoidosis | 0.560216042 |
| <i>Bacillales_Family_XI</i>   | Sarcoidosis | 0.425189612 |
| <i>Actinomycetaceae</i>       | Sarcoidosis | 0.367731556 |
| <i>Ruminococcaceae</i>        | Sarcoidosis | 0.304527695 |
| <i>Corynebacteriaceae</i>     | Sarcoidosis | 0.249942542 |

---

---

|                                    |             |             |
|------------------------------------|-------------|-------------|
| <i>Azospirillaceae</i>             | Sarcoidosis | 0.201103195 |
| <i>Campylobacteraceae</i>          | Sarcoidosis | 0.152263847 |
| <i>Caulobacteraceae</i>            | Sarcoidosis | 0.146518042 |
| <i>Rhodocyclaceae</i>              | Sarcoidosis | 0.140772236 |
| <i>Erysipelotrichaceae</i>         | Sarcoidosis | 0.137899333 |
| <i>Saccharimonadaceae</i>          | Sarcoidosis | 0.112043208 |
| <i>Mycobacteriaceae</i>            | Sarcoidosis | 0.100551597 |
| <i>Chitinophagaceae</i>            | Sarcoidosis | 0.097678695 |
| <i>Hyphomicrobiaceae</i>           | Sarcoidosis | 0.097678695 |
| <i>Clostridiales_Family_XIII</i>   | Sarcoidosis | 0.089059986 |
| <i>Peptostreptococcaceae</i>       | Sarcoidosis | 0.077568375 |
| <i>Spirochaetaceae</i>             | Sarcoidosis | 0.077568375 |
| <i>Bacteriovoracaceae</i>          | Sarcoidosis | 0.07182257  |
| <i>Moraxellaceae</i>               | Sarcoidosis | 0.07182257  |
| <i>Rhizobiales_Incertae_Sedis</i>  | Sarcoidosis | 0.068949667 |
| <i>Beijerinckiaceae</i>            | Sarcoidosis | 0.054585153 |
| <i>Atopobiaceae</i>                | Sarcoidosis | 0.048839347 |
| <i>Mycoplasmataceae</i>            | Sarcoidosis | 0.045966444 |
| <i>Solibacteraceae_Subgroup_3_</i> | Sarcoidosis | 0.045966444 |
| <i>Bifidobacteriaceae</i>          | Sarcoidosis | 0.043093542 |
| <i>Christensenellaceae</i>         | Sarcoidosis | 0.043093542 |
| <i>Rhodanobacteraceae</i>          | Sarcoidosis | 0.043093542 |
| <i>Aerococcaceae</i>               | Sarcoidosis | 0.037347736 |
| <i>Clostridiales_Family_XI</i>     | Sarcoidosis | 0.037347736 |
| <i>Bacillaceae</i>                 | Sarcoidosis | 0.028729028 |
| <i>Coriobacteriaceae</i>           | Sarcoidosis | 0.028729028 |
| <i>Microbacteriaceae</i>           | Sarcoidosis | 0.025856125 |
| <i>Propionibacteriaceae</i>        | Sarcoidosis | 0.020110319 |
| <i>Tannerellaceae</i>              | Sarcoidosis | 0.020110319 |
| <i>Aeromonadaceae</i>              | Sarcoidosis | 0.017237417 |
| <i>Blastocatellaceae</i>           | Sarcoidosis | 0.017237417 |

---

|                                                     |             |             |
|-----------------------------------------------------|-------------|-------------|
| <i>Lentimicrobiaceae</i>                            | Sarcoidosis | 0.017237417 |
| <i>Thermaceae</i>                                   | Sarcoidosis | 0.017237417 |
| <i>Nocardiaceae</i>                                 | Sarcoidosis | 0.014364514 |
| <i>Paludibacteraceae</i>                            | Sarcoidosis | 0.014364514 |
| <i>Clostridiales_vadinBB60_group</i>                | Sarcoidosis | 0.011491611 |
| <i>Desulfovibrionaceae</i>                          | Sarcoidosis | 0.011491611 |
| <i>Devosiaceae</i>                                  | Sarcoidosis | 0.011491611 |
| <i>Fimbriimonadaceae</i>                            | Sarcoidosis | 0.011491611 |
| <i>Geminicoccaceae</i>                              | Sarcoidosis | 0.011491611 |
| <i>Lactobacillaceae</i>                             | Sarcoidosis | 0.011491611 |
| <i>Acetobacteraceae</i>                             | Sarcoidosis | 0.008618708 |
| <i>Marinifilaceae</i>                               | Sarcoidosis | 0.008618708 |
| <i>Parvibaculaceae</i>                              | Sarcoidosis | 0.008618708 |
| <i>Rikenellaceae</i>                                | Sarcoidosis | 0.008618708 |
| <i>Bacillales_Family_XII</i>                        | Sarcoidosis | 0.005745806 |
| <i>Candidatus_Saccharibacteria_bacterium_UB2523</i> | Sarcoidosis | 0.005745806 |
| <i>Kaistiaceae</i>                                  | Sarcoidosis | 0.005745806 |
| <i>Planococcaceae</i>                               | Sarcoidosis | 0.005745806 |
| <i>Rubinisphaeraceae</i>                            | Sarcoidosis | 0.005745806 |
| <i>Synergistaceae</i>                               | Sarcoidosis | 0.005745806 |
| <i>Cardiobacteriaceae</i>                           | Sarcoidosis | 0.002872903 |
| <i>Chlamydiales_cvE6</i>                            | Sarcoidosis | 0.002872903 |
| <i>Gemmataceae</i>                                  | Sarcoidosis | 0.002872903 |
| <i>Halomonadaceae</i>                               | Sarcoidosis | 0.002872903 |
| <i>Pirellulaceae</i>                                | Sarcoidosis | 0.002872903 |
| <i>Sneathiellaceae</i>                              | Sarcoidosis | 0.002872903 |
| <i>Acidaminococcaceae</i>                           | Sarcoidosis | 0           |
| <i>Akkermansiaceae</i>                              | Sarcoidosis | 0           |
| <i>Alteromonadaceae</i>                             | Sarcoidosis | 0           |
| <i>Anaerolineaceae</i>                              | Sarcoidosis | 0           |
| <i>Anaeroplasmataceae</i>                           | Sarcoidosis | 0           |

---

|                                                |             |   |
|------------------------------------------------|-------------|---|
| <i>Bacteroidaceae</i>                          | Sarcoidosis | 0 |
| <i>Bacteroidales_F082</i>                      | Sarcoidosis | 0 |
| <i>Barnesiellaceae</i>                         | Sarcoidosis | 0 |
| <i>Betaproteobacteriales_TRA3_20</i>           | Sarcoidosis | 0 |
| <i>Cellvibrionaceae</i>                        | Sarcoidosis | 0 |
| <i>Chromobacteriaceae</i>                      | Sarcoidosis | 0 |
| <i>Chthoniobacteraceae</i>                     | Sarcoidosis | 0 |
| <i>Coriobacteriales_Incertae_Sedis</i>         | Sarcoidosis | 0 |
| <i>Coxiellaceae</i>                            | Sarcoidosis | 0 |
| <i>Dermabacteraceae</i>                        | Sarcoidosis | 0 |
| <i>Eggerthellaceae</i>                         | Sarcoidosis | 0 |
| <i>Enterococcaceae</i>                         | Sarcoidosis | 0 |
| <i>Geodermatophilaceae</i>                     | Sarcoidosis | 0 |
| <i>Hydrogenophilaceae</i>                      | Sarcoidosis | 0 |
| <i>Hymenobacteraceae</i>                       | Sarcoidosis | 0 |
| <i>Ilumatobacteraceae</i>                      | Sarcoidosis | 0 |
| <i>Intrasporangiaceae</i>                      | Sarcoidosis | 0 |
| <i>Legionellaceae</i>                          | Sarcoidosis | 0 |
| <i>Leuconostocaceae</i>                        | Sarcoidosis | 0 |
| <i>Listeriaceae</i>                            | Sarcoidosis | 0 |
| <i>Muribaculaceae</i>                          | Sarcoidosis | 0 |
| <i>Nocardioidaceae</i>                         | Sarcoidosis | 0 |
| <i>Oligoflexales_0319_6G20</i>                 | Sarcoidosis | 0 |
| <i>Opitutaceae</i>                             | Sarcoidosis | 0 |
| <i>Paenibacillaceae</i>                        | Sarcoidosis | 0 |
| <i>Peptococcaceae</i>                          | Sarcoidosis | 0 |
| <i>Pseudonocardiaceae</i>                      | Sarcoidosis | 0 |
| <i>Rhodobacteraceae</i>                        | Sarcoidosis | 0 |
| <i>Rickettsiaceae</i>                          | Sarcoidosis | 0 |
| <i>Sphingobacteriales_NS11_12_marine_group</i> | Sarcoidosis | 0 |
| <i>Streptomycetaceae</i>                       | Sarcoidosis | 0 |

---

---

|                                       |             |   |
|---------------------------------------|-------------|---|
| <i>Succinivibrionaceae</i>            | Sarcoidosis | 0 |
| <i>Thermoactinomycetaceae</i>         | Sarcoidosis | 0 |
| <i>Thermomicrobiales_JG30_KF_CM45</i> | Sarcoidosis | 0 |

---



**Supplementary Table S6:** List of differentially abundant taxa in the disease group determined by LefSe analysis.

| Taxa                                                                                                    | Disease          | LDA value   | p-value     |
|---------------------------------------------------------------------------------------------------------|------------------|-------------|-------------|
| Bacteria.Firmicutes.Bacilli.Lactobacillales.Streptococcaceae.Streptococcus.OTUID_926                    | Exacerbated COPD | 4.572829633 | 0.0323923   |
| Bacteria.Firmicutes.Clostridia.Clostridiales.Ruminococcaceae.Faecalibacterium                           | Exacerbated COPD | 3.626306434 | 0.04071854  |
| Bacteria.Firmicutes.Clostridia.Clostridiales.Lachnospiraceae.Coprococcus                                | Exacerbated COPD | 3.159305516 | 0.013919972 |
| Bacteria.Proteobacteria.Gammaproteobacteria.Pasteurellales.Pasteurellaceae.Haemophilus.OTUID_375        | ILD              | 4.4636194   | 0.049337409 |
| Bacteria.Proteobacteria.Gammaproteobacteria.Xanthomonadales.Xanthomonadaceae.Stenotrophomonas.OTUID_166 | ILD              | 3.751730583 | 0.018698125 |
| Bacteria.Proteobacteria.Gammaproteobacteria.Pasteurellales.Pasteurellaceae.Haemophilus.OTUID_354        | ILD              | 3.687481704 | 0.029850028 |
| Bacteria.Proteobacteria.Gammaproteobacteria.Enterobacteriales.Enterobacteriaceae.OTUID_238              | ILD              | 3.176452782 | 0.048171506 |
| Bacteria.Proteobacteria.Gammaproteobacteria.Pasteurellales.Pasteurellaceae.Actinobacillus               | Stable COPD      | 4.30726047  | 0.000387691 |
| Bacteria.Proteobacteria.Gammaproteobacteria.Pasteurellales.Pasteurellaceae.Actinobacillus.OTUID_381     | Stable COPD      | 4.14427881  | 0.00465136  |
| Bacteria.Proteobacteria.Gammaproteobacteria.Betaproteobacteriales.Burkholderiaceae.Massilia             | Stable COPD      | 3.78714392  | 0.036232632 |
| Bacteria.Proteobacteria.Alphaproteobacteria.Reyranellales.Reyranellaceae.Reyranella.OTUID_59            | Stable COPD      | 3.707268185 | 6.82336E-05 |
| Bacteria.Chlamydiae                                                                                     | Stable COPD      | 3.661756478 | 0.014600486 |
| Bacteria.Chlamydiae.Chlamydiae.Chlamydiales                                                             | Stable COPD      | 3.660149387 | 0.014600486 |
| Bacteria.Chlamydiae.Chlamydiae                                                                          | Stable COPD      | 3.658384673 | 0.014600486 |
| Bacteria.Chlamydiae.Chlamydiae.Chlamydiales.Simkaniaceae                                                | Stable COPD      | 3.656901461 | 0.018910204 |
| Bacteria.Chlamydiae.Chlamydiae.Chlamydiales.Simkaniaceae.OTUID_48                                       | Stable COPD      | 3.6551978   | 0.018910204 |
| Bacteria.Firmicutes.Negativicutes.Selenomonadales.Veillonellaceae.Megasphaera                           | Stable COPD      | 3.476029765 | 0.040711691 |
| Bacteria.Firmicutes.Negativicutes.Selenomonadales.Veillonellaceae.Dialister                             | Stable COPD      | 3.474076339 | 0.009051633 |
| Bacteria.Proteobacteria.Gammaproteobacteria.Pasteurellales.Pasteurellaceae.Actinobacillus.OTUID_380     | Stable COPD      | 3.459572182 | 0.038652311 |
| Bacteria.Proteobacteria.Gammaproteobacteria.Enterobacteriales.Enterobacteriaceae.Enterobacter.OTUID_198 | Stable COPD      | 3.454489    | 0.030698381 |
| Bacteria.Bacteroidetes.Bacteroidia.Chitinophagales.Chitinophagaceae                                     | Stable COPD      | 3.41185366  | 0.000176602 |
| Bacteria.Bacteroidetes.Bacteroidia.Chitinophagales                                                      | Stable COPD      | 3.411519919 | 0.000176602 |
| Bacteria.Proteobacteria.Gammaproteobacteria.Pasteurellales.Pasteurellaceae.Aggregatibacter              | Stable COPD      | 3.38711086  | 0.028447531 |

|                                                                                                            |             |             |             |
|------------------------------------------------------------------------------------------------------------|-------------|-------------|-------------|
| Bacteria.Proteobacteria.Gammaproteobacteria.Betaproteobacteriales.Burkholderiaceae.Achromobacter.OTUID_444 | Stable COPD | 3.331072602 | 0.049869671 |
| Bacteria.Bacteroidetes.Bacteroidia.Chitinophagales.Chitinophagaceae.Chitinophaga                           | Stable COPD | 3.326248984 | 0.0006531   |
| Bacteria.Firmicutes.Negativicutes.Selenomonadales.Veillonellaceae.Dialister.OTUID_1103                     | Stable COPD | 3.311041847 | 0.046541121 |
| Bacteria.Bacteroidetes.Bacteroidia.Flavobacteriales.Weeksellaceae.Elizabethkingia                          | Stable COPD | 3.300208994 | 0.022848053 |
| Bacteria.Bacteroidetes.Bacteroidia.Flavobacteriales.Weeksellaceae.Elizabethkingia.OTUID_2056               | Stable COPD | 3.296872222 | 0.022848053 |
| Bacteria.Proteobacteria.Alphaproteobacteria.Rhizobiales.Rhizobiaceae.Mesorhizobium.OTUID_143               | Stable COPD | 3.150616596 | 0.000209963 |
| Bacteria.Bacteroidetes.Bacteroidia.Chitinophagales.Chitinophagaceae.Chitinophaga.OTUID_1629                | Stable COPD | 3.129029406 | 0.015070339 |
| Bacteria.Bacteroidetes.Bacteroidia.Bacteroidales.Prevotellaceae.Prevotella.OTUID_1881                      | Stable COPD | 3.124220686 | 0.041045906 |
| Bacteria.Proteobacteria.Alphaproteobacteria.Azospirillales.Azospirillaceae                                 | Stable COPD | 3.08510999  | 0.026530685 |
| Bacteria.Proteobacteria.Alphaproteobacteria.Azospirillales                                                 | Stable COPD | 3.084630659 | 0.026530685 |
| Bacteria.Proteobacteria.Alphaproteobacteria.Azospirillales.Azospirillaceae.Azospirillum                    | Stable COPD | 3.082379694 | 0.026530685 |
| Bacteria.Proteobacteria.Alphaproteobacteria.Azospirillales.Azospirillaceae.Azospirillum.OTUID_60           | Stable COPD | 3.079957631 | 0.026530685 |
| Bacteria.Proteobacteria.Gammaproteobacteria.Pasteurellales.Pasteurellaceae.Haemophilus.OTUID_335           | Stable COPD | 3.046929561 | 0.030698381 |
| Bacteria.Firmicutes.Erysipelotrichia.Erysipelotrichales.Erysipelotrichaceae.Holdemanella                   | Stable COPD | 3.008763238 | 0.022407549 |
| Bacteria.Actinobacteria.Actinobacteria.Corynebacteriales                                                   | Sarcoidosis | 3.204804954 | 0.010923783 |
| Bacteria.Actinobacteria.Actinobacteria.Corynebacteriales.Corynebacteriaceae.Corynebacterium                | Sarcoidosis | 3.069109508 | 0.032611055 |
| Bacteria.Proteobacteria.Gammaproteobacteria.Betaproteobacteriales.Neisseriaceae.Neisseria.OTUID_476        | Sarcoidosis | 3.032090323 | 0.029850028 |

**Supplementary Table S7:** List of ASVs and their taxonomic classification obtained through core microbiome analysis for disease group.

| ASV ID                            | Disease             | Kingdom  | Phylum         | Class               | Order                        | Family                    | Genus                       | Species                       |
|-----------------------------------|---------------------|----------|----------------|---------------------|------------------------------|---------------------------|-----------------------------|-------------------------------|
| d44b60b26ebc01728a51b8a1cd5d9ccc  | Exacerbated<br>COPD | Bacteria | Proteobacteria | Alphaproteobacteria | <i>Reyranelles</i>           | <i>Reyraneliaceae</i>     | <i>Reyranela</i>            |                               |
| e56516a9aabcee32a7426bd3894861a2  | Exacerbated<br>COPD | Bacteria | Proteobacteria | Alphaproteobacteria | <i>Sphingomonadales</i>      | <i>Sphingomonadaceae</i>  | <i>Sphingomonas</i>         |                               |
| 21b372faee1e8cf4ff63fb919ce52b2   | Exacerbated<br>COPD | Bacteria | Proteobacteria | Alphaproteobacteria | <i>Rhizobiales</i>           | <i>Xanthobacteraceae</i>  |                             |                               |
| bbf2fc899ad681cdaff0b9eb914c37cdd | Exacerbated<br>COPD | Bacteria | Proteobacteria | Alphaproteobacteria | <i>Rhizobiales</i>           | <i>Xanthobacteraceae</i>  |                             |                               |
| ca0285f0e074a69bf90f7fb6763ca7cc  | Exacerbated<br>COPD | Bacteria | Proteobacteria | Alphaproteobacteria | <i>Rhizobiales</i>           | <i>Rhizobiaceae</i>       | <i>Ochrobactrum</i>         |                               |
| fc71ae7eda4a4430ce3474b70abc6a68  | Exacerbated<br>COPD | Bacteria | Proteobacteria | Alphaproteobacteria | <i>Rhizobiales</i>           | <i>Rhizobiaceae</i>       | <i>Mesorhizobium</i>        |                               |
| c3dd369e13ccb4d1b19bc1aac91917ca  | Exacerbated<br>COPD | Bacteria | Proteobacteria | Gammaproteobacteria | <i>Xanthomonadales</i>       | <i>Xanthomonadaceae</i>   | <i>Stenotrophomonas</i>     |                               |
| c6f0fe3a269137720ca341ec873169    | Exacerbated<br>COPD | Bacteria | Proteobacteria | Gammaproteobacteria | <i>Enterobacteriales</i>     | <i>Enterobacteriaceae</i> | <i>Escherichia_Shigella</i> |                               |
| 584a15a8b8273021c7e3e7d07d3bc48d  | Exacerbated<br>COPD | Bacteria | Proteobacteria | Gammaproteobacteria | <i>Betaproteobacteriales</i> | <i>Burkholderiaceae</i>   | <i>Ralstonia</i>            |                               |
| 7f1495320cf00e9f81e455ea44145d2c  | Exacerbated<br>COPD | Bacteria | Proteobacteria | Gammaproteobacteria | <i>Betaproteobacteriales</i> | <i>Burkholderiaceae</i>   | <i>Achromobacter</i>        |                               |
| 616cd8134b106d6ed8e9cd6edce9a82a  | Exacerbated<br>COPD | Bacteria | Proteobacteria | Gammaproteobacteria | <i>Pseudomonadales</i>       | <i>Pseudomonadaceae</i>   | <i>Pseudomonas</i>          | <i>Pseudomonas_aeruginosa</i> |
| b8a03689f1c69c6623c731cce70d1f4a  | Exacerbated<br>COPD | Bacteria | Fusobacteria   | Fusobacteriia       | <i>Fusobacteriales</i>       | <i>Fusobacteriaceae</i>   | <i>Fusobacterium</i>        |                               |
| 76ba84783044dc63a25709724d12740f  | Exacerbated<br>COPD | Bacteria | Firmicutes     | Bacilli             | <i>Lactobacillales</i>       | <i>Streptococcaceae</i>   | <i>Streptococcus</i>        |                               |
| 9adcea5ae4bfb4764d7ac5025de92c6d  | Exacerbated<br>COPD | Bacteria | Firmicutes     | Bacilli             | <i>Lactobacillales</i>       | <i>Streptococcaceae</i>   | <i>Streptococcus</i>        |                               |

|                                   |                     |          |                    |                     |                           |                             |                                      |
|-----------------------------------|---------------------|----------|--------------------|---------------------|---------------------------|-----------------------------|--------------------------------------|
| 9160e6b439750e23c5b6b6976e8f999   | Exacerbated<br>COPD | Bacteria | Firmicutes         | Erysipelotrichia    | <i>Erysipelotrichales</i> | <i>Erysipelotrichaceae</i>  | <i>Catenibacterium</i>               |
| 642c42a9c0ccb1cfcabd86e2205edbf8  | Exacerbated<br>COPD | Bacteria | Firmicutes         | Bacilli             | <i>Bacillales</i>         | <i>Bacillales_Family_XI</i> | <i>Gemella</i>                       |
| b15c7ffc9025f0458b58978326cd99b9  | Exacerbated<br>COPD | Bacteria | Firmicutes         | Bacilli             | <i>Lactobacillales</i>    | <i>Carnobacteriaceae</i>    | <i>Granulicatella</i>                |
| 78d779cecd8b01d5dd1e32a4e98509039 | Exacerbated<br>COPD | Bacteria | Firmicutes         | Negativicutes       | <i>Selenomonadales</i>    | <i>Veillonellaceae</i>      | <i>Dialister</i>                     |
| 12c9f21b276ff04fb4caf797c9cbf68e  | Exacerbated<br>COPD | Bacteria | Firmicutes         | Clostridia          | <i>Clostridiales</i>      | <i>Christensenellaceae</i>  | <i>Christensenellaceae_R_7_group</i> |
| 477bbdf91d68dceea38040dd249ba3e8  | Exacerbated<br>COPD | Bacteria | Firmicutes         | Clostridia          | <i>Clostridiales</i>      | <i>Ruminococcaceae</i>      | <i>Subdoligranulum</i>               |
| 72930a2e533f2c174341b760550850c9  | Exacerbated<br>COPD | Bacteria | Bacteroidetes      | Bacteroidia         | <i>Bacteroidales</i>      | <i>Prevotellaceae</i>       | <i>Prevotella</i>                    |
| ab7c6ac58527511c2256ec4eded035f8  | Exacerbated<br>COPD | Bacteria | Bacteroidetes      | Bacteroidia         | <i>Flavobacteriales</i>   | <i>Weeksellaceae</i>        | <i>Chryseobacterium</i>              |
| 1c0b01a1271927fd61457bee46e6d4be  | Stable<br>COPD      | Bacteria | Epsilonbacteraeota | Campylobacteria     | <i>Campylobacterales</i>  | <i>Campylobacteraceae</i>   | <i>Campylobacter</i>                 |
| 43c574f67b0c843c24be7ff59058603b  | Stable<br>COPD      | Bacteria | Chlamydiae         | Chlamydiae          | <i>Chlamydiales</i>       | <i>Simkaniaceae</i>         |                                      |
| d44b60b26ebc01728a51b8a1cd5d9ccc  | Stable<br>COPD      | Bacteria | Proteobacteria     | Alphaproteobacteria | <i>Reyranellales</i>      | <i>Reyranellaceae</i>       | <i>Reyranella</i>                    |
| b8e86a79aa5a318d12e80eece549b4b4  | Stable<br>COPD      | Bacteria | Proteobacteria     | Alphaproteobacteria | <i>Reyranellales</i>      | <i>Reyranellaceae</i>       | <i>Reyranella</i>                    |
| bae07d3bb70f0fa015ec481fc82a61d3  | Stable<br>COPD      | Bacteria | Proteobacteria     | Alphaproteobacteria | <i>Azospirillales</i>     | <i>Azospirillaceae</i>      | <i>Azospirillum</i>                  |
| e56516a9aabcee32a7426bd3894861a2  | Stable<br>COPD      | Bacteria | Proteobacteria     | Alphaproteobacteria | <i>Sphingomonadales</i>   | <i>Sphingomonadaceae</i>    | <i>Sphingomonas</i>                  |
| 21b372faee1e8cf4fff63fb919ce52b2  | Stable<br>COPD      | Bacteria | Proteobacteria     | Alphaproteobacteria | <i>Rhizobiales</i>        | <i>Xanthobacteraceae</i>    |                                      |
| bbf2fc899ad681cdaf0b9eb914c37cdd  | Stable<br>COPD      | Bacteria | Proteobacteria     | Alphaproteobacteria | <i>Rhizobiales</i>        | <i>Xanthobacteraceae</i>    |                                      |
| ca0285f0e074a69bf90f7fb6763ca7cc  | Stable<br>COPD      | Bacteria | Proteobacteria     | Alphaproteobacteria | <i>Rhizobiales</i>        | <i>Rhizobiaceae</i>         | <i>Ochrobactrum</i>                  |
| fc71ae7eda4a4430ce3474b70abc6a68  | Stable<br>COPD      | Bacteria | Proteobacteria     | Alphaproteobacteria | <i>Rhizobiales</i>        | <i>Rhizobiaceae</i>         | <i>Mesorhizobium</i>                 |
| b283956b5c8dca5e6122dcd0ede1a45e  | Stable<br>COPD      | Bacteria | Proteobacteria     | Alphaproteobacteria | <i>Rhizobiales</i>        | <i>Rhizobiaceae</i>         | <i>Mesorhizobium</i>                 |

|                                   |                |          |                |                     |                       |                            |                      |                        |
|-----------------------------------|----------------|----------|----------------|---------------------|-----------------------|----------------------------|----------------------|------------------------|
| 0a4415dda4e2748976f0087a87d0f86   | Stable<br>COPD | Bacteria | Proteobacteria | Alphaproteobacteria | Rhizobiales           | Hyphomicrobiaceae          | Hyphomicrobium       |                        |
| 5c90f1226258dccc1314b3da5fb50686  | Stable<br>COPD | Bacteria | Proteobacteria | Gammaproteobacteria | Xanthomonadales       | Xanthomonadaceae           | Pseudoxanthomonas    |                        |
| e648ca13dc100dda271c75f8fea94de9  | Stable<br>COPD | Bacteria | Proteobacteria | Gammaproteobacteria | Xanthomonadales       | Xanthomonadaceae           | Stenotrophomonas     |                        |
| c6f0efea3a269137720ca341ec873169  | Stable<br>COPD | Bacteria | Proteobacteria | Gammaproteobacteria | Enterobacteriales     | Enterobacteriaceae         | Escherichia_Shigella |                        |
| ed33d85165cf28fced2062b5c09b906c  | Stable<br>COPD | Bacteria | Proteobacteria | Gammaproteobacteria | Pasteurellales        | Pasteurellaceae            | Haemophilus          |                        |
| a0df70628cd44941e49b90ef475435a6  | Stable<br>COPD | Bacteria | Proteobacteria | Gammaproteobacteria | Pasteurellales        | Pasteurellaceae            | Actinobacillus       |                        |
| 584a15a8b8273021c7e3e7d07d3bc48d  | Stable<br>COPD | Bacteria | Proteobacteria | Gammaproteobacteria | Betaproteobacteriales | Burkholderiaceae           | Ralstonia            |                        |
| 62e3189638c1d1ca7e69cbdbf869d5d0  | Stable<br>COPD | Bacteria | Proteobacteria | Gammaproteobacteria | Betaproteobacteriales | Burkholderiaceae           | Massilia             |                        |
| 7ef3182e920f78b045bd815eda5b9d9   | Stable<br>COPD | Bacteria | Proteobacteria | Gammaproteobacteria | Betaproteobacteriales | Burkholderiaceae           | Achromobacter        |                        |
| 7f1495320cf00e9f81e455ea44145d2c  | Stable<br>COPD | Bacteria | Proteobacteria | Gammaproteobacteria | Betaproteobacteriales | Burkholderiaceae           | Achromobacter        |                        |
| 616cd8134b106d6ed8e9cd6edce9a82a  | Stable<br>COPD | Bacteria | Proteobacteria | Gammaproteobacteria | Pseudomonadales       | Pseudomonadaceae           | Pseudomonas          | Pseudomonas_aeruginosa |
| 96c77409f836c79532629b787bd4f7f   | Stable<br>COPD | Bacteria | Proteobacteria | Gammaproteobacteria | Pseudomonadales       | Pseudomonadaceae           | Pseudomonas          | Pseudomonas_stutzeri   |
| 3e93a180549b96db8995ed7cc6d6eaa8  | Stable<br>COPD | Bacteria | Proteobacteria | Gammaproteobacteria |                       |                            |                      |                        |
| 75a7f524e7dd1a59e9fac8a248da9e40  | Stable<br>COPD | Bacteria | Actinobacteria | Actinobacteria      | Corynebacteriales     | Mycobacteriaceae           | Mycobacterium        |                        |
| dc5b26848cac5ada34a8293bcecc7408  | Stable<br>COPD | Bacteria | Acidobacteria  | Acidobacteriia      | Solibacterales        | Solibacteraceae_Subgroup_3 | Paludibaculum        |                        |
| b8a03689f1c69c6623c731cce70d1f4a  | Stable<br>COPD | Bacteria | Fusobacteria   | Fusobacteriia       | Fusobacteriales       | Fusobacteriaceae           | Fusobacterium        |                        |
| 76ba84783044dc63a25709724d12740f  | Stable<br>COPD | Bacteria | Firmicutes     | Bacilli             | Lactobacillales       | Streptococcaceae           | Streptococcus        |                        |
| 642c42a9c0ccb1cfcabd86e2205edbf8  | Stable<br>COPD | Bacteria | Firmicutes     | Bacilli             | Bacillales            | Bacillales_Family_XI       | Gemella              |                        |
| b15c7ffc9025f0458b58978326cd99b9  | Stable<br>COPD | Bacteria | Firmicutes     | Bacilli             | Lactobacillales       | Carnobacteriaceae          | Granulicatella       |                        |
| 78d779cecd8b01d5dd1e32a4e98509039 | Stable<br>COPD | Bacteria | Firmicutes     | Negativicutes       | Selenomonadales       | Veillonellaceae            | Dialister            |                        |
| e7c5690166d106cd3e6f50e7a7f36562  | Stable<br>COPD | Bacteria | Firmicutes     | Negativicutes       | Selenomonadales       | Veillonellaceae            | Veillonella          |                        |

|                                  |                |          |                    |                     |                              |                                   |                          |                                      |
|----------------------------------|----------------|----------|--------------------|---------------------|------------------------------|-----------------------------------|--------------------------|--------------------------------------|
| 0362fa463ae8c79c2e4e013b873166ac | Stable<br>COPD | Bacteria | Bacteroidetes      | Bacteroidia         | <i>Chitinophagales</i>       | <i>Chitinophagaceae</i>           | <i>Chitinophaga</i>      |                                      |
| 72930a2e533f2c174341b760550850c9 | Stable<br>COPD | Bacteria | Bacteroidetes      | Bacteroidia         | <i>Bacteroidales</i>         | <i>Prevotellaceae</i>             | <i>Prevotella</i>        |                                      |
| dec59104e90212646e1ab72f2db4f326 | Stable<br>COPD | Bacteria | Bacteroidetes      | Bacteroidia         | <i>Flavobacteriales</i>      | <i>Weeksellaceae</i>              | <i>Elizabethkingia</i>   |                                      |
| ab7c6ac58527511c2256ec4eded035f8 | Stable<br>COPD | Bacteria | Bacteroidetes      | Bacteroidia         | <i>Flavobacteriales</i>      | <i>Weeksellaceae</i>              | <i>Chryseobacterium</i>  |                                      |
| de287dd37785fcd58644cfeeabcd45f4 | Stable<br>COPD | Bacteria | Bacteroidetes      | Bacteroidia         | <i>Sphingobacteriales</i>    | <i>Sphingobacteriaceae</i>        | <i>Sphingobacterium</i>  | <i>Sphingobacterium_spiritivorum</i> |
| 0d335e6d528bb27c55a31539feb8517f | Stable<br>COPD | Bacteria | Firmicutes         | Clostridia          | <i>Clostridiales</i>         | <i>Lachnospiraceae</i>            | <i>Agathobacter</i>      |                                      |
| 1c0b01a1271927fd61457bee46e6d4be | Sarcoidosis    | Bacteria | Epsilonbacteraeota | Campylobacteria     | <i>Campylobacterales</i>     | <i>Campylobacteraceae</i>         | <i>Campylobacter</i>     |                                      |
| 43c574f67b0c843c24be7ff59058603b | Sarcoidosis    | Bacteria | Chlamydiae         | Chlamydiae          | <i>Chlamydiales</i>          | <i>Simkaniaceae</i>               |                          |                                      |
| d44b60b26ebc01728a51b8a1cd5d9ccc | Sarcoidosis    | Bacteria | Proteobacteria     | Alphaproteobacteria | <i>Reyranellales</i>         | <i>Reyranellaceae</i>             | <i>Reyranella</i>        |                                      |
| bae07d3bb70f0fa015ec481fc82a61d3 | Sarcoidosis    | Bacteria | Proteobacteria     | Alphaproteobacteria | <i>Azospirillales</i>        | <i>Azospirillaceae</i>            | <i>Azospirillum</i>      |                                      |
| e56516a9aabcee32a7426bd3894861a2 | Sarcoidosis    | Bacteria | Proteobacteria     | Alphaproteobacteria | <i>Sphingomonadales</i>      | <i>Sphingomonadaceae</i>          | <i>Sphingomonas</i>      |                                      |
| 21b372faee1e8cf4fff63fb919ce52b2 | Sarcoidosis    | Bacteria | Proteobacteria     | Alphaproteobacteria | <i>Rhizobiales</i>           | <i>Xanthobacteraceae</i>          |                          |                                      |
| 34b943abb7623f70ea626ede05f44458 | Sarcoidosis    | Bacteria | Proteobacteria     | Alphaproteobacteria | <i>Rhizobiales</i>           | <i>Xanthobacteraceae</i>          | <i>Bradyrhizobium</i>    |                                      |
| bbf2fc899ad681cdaf0b9eb914c37cdd | Sarcoidosis    | Bacteria | Proteobacteria     | Alphaproteobacteria | <i>Rhizobiales</i>           | <i>Xanthobacteraceae</i>          |                          |                                      |
| 047da6a283557bfaf7dca1047d4cef27 | Sarcoidosis    | Bacteria | Proteobacteria     | Alphaproteobacteria | <i>Rhizobiales</i>           | <i>Rhizobiales_Incertae_Sedis</i> | <i>Nordella</i>          |                                      |
| ca0285f0e074a69bf90f7fb6763ca7cc | Sarcoidosis    | Bacteria | Proteobacteria     | Alphaproteobacteria | <i>Rhizobiales</i>           | <i>Rhizobiaceae</i>               | <i>Ochrobactrum</i>      |                                      |
| fc71ae7eda4a4430ce3474b70abc6a68 | Sarcoidosis    | Bacteria | Proteobacteria     | Alphaproteobacteria | <i>Rhizobiales</i>           | <i>Rhizobiaceae</i>               | <i>Mesorhizobium</i>     |                                      |
| c3dd369e13ccb4d1b19bc1aac91917ca | Sarcoidosis    | Bacteria | Proteobacteria     | Gammaproteobacteria | <i>Xanthomonadales</i>       | <i>Xanthomonadaceae</i>           | <i>Stenotrophomonas</i>  |                                      |
| a4612e820ea7a0cc568833ed8ad0b4e6 | Sarcoidosis    | Bacteria | Proteobacteria     | Gammaproteobacteria | <i>Xanthomonadales</i>       | <i>Xanthomonadaceae</i>           | <i>Vulcaniibacterium</i> |                                      |
| ed33d85165cf28fcd2062b5c09b906c  | Sarcoidosis    | Bacteria | Proteobacteria     | Gammaproteobacteria | <i>Pasteurellales</i>        | <i>Pasteurellaceae</i>            | <i>Haemophilus</i>       |                                      |
| 584a15a8b8273021c7e3e7d07d3bc48d | Sarcoidosis    | Bacteria | Proteobacteria     | Gammaproteobacteria | <i>Betaproteobacteriales</i> | <i>Burkholderiaceae</i>           | <i>Ralstonia</i>         |                                      |
| 62e3189638c1d1ca7e69cbdbf869d5d0 | Sarcoidosis    | Bacteria | Proteobacteria     | Gammaproteobacteria | <i>Betaproteobacteriales</i> | <i>Burkholderiaceae</i>           | <i>Massilia</i>          |                                      |
| 7ef3182e920f78b045bd815eda5b9d9  | Sarcoidosis    | Bacteria | Proteobacteria     | Gammaproteobacteria | <i>Betaproteobacteriales</i> | <i>Burkholderiaceae</i>           | <i>Achromobacter</i>     |                                      |
| 7f1495320cf00e9f81e455ea44145d2c | Sarcoidosis    | Bacteria | Proteobacteria     | Gammaproteobacteria | <i>Betaproteobacteriales</i> | <i>Burkholderiaceae</i>           | <i>Achromobacter</i>     |                                      |

|                                  |             |          |                |                     |                              |                             |                          |                                                               |
|----------------------------------|-------------|----------|----------------|---------------------|------------------------------|-----------------------------|--------------------------|---------------------------------------------------------------|
| 0a9e2ee24e414199dc0e7e90bdd3c33f | Sarcoidosis | Bacteria | Proteobacteria | Gammaproteobacteria | <i>Betaproteobacteriales</i> | <i>Rhodocyclaceae</i>       | <i>Methyloversatilis</i> |                                                               |
| c6eb5c0b8347faff7c918df42bbf1f29 | Sarcoidosis | Bacteria | Proteobacteria | Gammaproteobacteria | <i>Betaproteobacteriales</i> | <i>Burkholderiaceae</i>     | <i>Variovorax</i>        |                                                               |
| 616cd8134b106d6ed8e9cd6edce9a82a | Sarcoidosis | Bacteria | Proteobacteria | Gammaproteobacteria | <i>Pseudomonadales</i>       | <i>Pseudomonadaceae</i>     | <i>Pseudomonas</i>       | <i>Pseudomonas_aeruginosa</i>                                 |
| d3b4fcc82367e8b333215f14ab29f9fe | Sarcoidosis | Bacteria | Firmicutes     | Bacilli             | <i>Lactobacillales</i>       | <i>Streptococcaceae</i>     | <i>Streptococcus</i>     | <i>Streptococcus_salivarius_s</i><br><i>ubsp_thermophilus</i> |
| 76ba84783044dc63a25709724d12740f | Sarcoidosis | Bacteria | Firmicutes     | Bacilli             | <i>Lactobacillales</i>       | <i>Streptococcaceae</i>     | <i>Streptococcus</i>     |                                                               |
| 7a17b0aeeb69be8bb0aa127caf00b5d7 | Sarcoidosis | Bacteria | Firmicutes     | Bacilli             | <i>Lactobacillales</i>       | <i>Streptococcaceae</i>     | <i>Streptococcus</i>     |                                                               |
| 642c42a9c0ccb1cfcabd86e2205edbf8 | Sarcoidosis | Bacteria | Firmicutes     | Bacilli             | <i>Bacillales</i>            | <i>Bacillales_Family_XI</i> | <i>Gemella</i>           |                                                               |
| ea23c38595086f7793f76cf307817dd2 | Sarcoidosis | Bacteria | Firmicutes     | Bacilli             | <i>Bacillales</i>            | <i>Staphylococcaceae</i>    | <i>Staphylococcus</i>    |                                                               |
| b15c7ffc9025f0458b58978326cd99b9 | Sarcoidosis | Bacteria | Firmicutes     | Bacilli             | <i>Lactobacillales</i>       | <i>Carnobacteriaceae</i>    | <i>Granulicatella</i>    |                                                               |
| e7c5690166d106cd3e6f50e7a7f36562 | Sarcoidosis | Bacteria | Firmicutes     | Negativicutes       | <i>Selenomonadales</i>       | <i>Veillonellaceae</i>      | <i>Veillonella</i>       |                                                               |
| b5022e5e3ff38bbeda64958306fe94dc | Sarcoidosis | Bacteria | Firmicutes     | Negativicutes       | <i>Selenomonadales</i>       | <i>Veillonellaceae</i>      | <i>Veillonella</i>       |                                                               |
| 126eb96d7899f09b820a34aa763e01c3 | Sarcoidosis | Bacteria | Firmicutes     | Negativicutes       | <i>Selenomonadales</i>       | <i>Veillonellaceae</i>      | <i>Veillonella</i>       |                                                               |
| 72930a2e533f2c174341b760550850c9 | Sarcoidosis | Bacteria | Bacteroidetes  | Bacteroidia         | <i>Bacteroidales</i>         | <i>Prevotellaceae</i>       | <i>Prevotella</i>        |                                                               |
| 286131addec0b1e8574145afaafc7f7c | Sarcoidosis | Bacteria | Bacteroidetes  | Bacteroidia         | <i>Bacteroidales</i>         | <i>Prevotellaceae</i>       | <i>Prevotella</i>        |                                                               |
| dec59104e90212646e1ab72f2db4f326 | Sarcoidosis | Bacteria | Bacteroidetes  | Bacteroidia         | <i>Flavobacteriales</i>      | <i>Weeksellaceae</i>        | <i>Elizabethkingia</i>   |                                                               |
| ab7c6ac58527511c2256ec4eded035f8 | Sarcoidosis | Bacteria | Bacteroidetes  | Bacteroidia         | <i>Flavobacteriales</i>      | <i>Weeksellaceae</i>        | <i>Chryseobacterium</i>  |                                                               |
| de287dd37785fcd58644cfceabcd45f4 | Sarcoidosis | Bacteria | Bacteroidetes  | Bacteroidia         | <i>Sphingobacteriales</i>    | <i>Sphingobacteriaceae</i>  | <i>Sphingobacterium</i>  | <i>Sphingobacterium_spiritiv</i><br><i>orum</i>               |
| 43c574f67b0c843c24be7ff59058603b | ILD         | Bacteria | Chlamydiae     | Chlamydiae          | <i>Chlamydiales</i>          | <i>Simkaniaceae</i>         |                          |                                                               |
| d44b60b26ebc01728a51b8a1cd5d9ccc | ILD         | Bacteria | Proteobacteria | Alphaproteobacteria | <i>Reyranelles</i>           | <i>Reyraneliaceae</i>       | <i>Reyranela</i>         |                                                               |
| bae07d3bb70f0fa015ec481fc82a61d3 | ILD         | Bacteria | Proteobacteria | Alphaproteobacteria | <i>Azospirillales</i>        | <i>Azospirillaceae</i>      | <i>Azospirillum</i>      |                                                               |
| 21b372faee1e8cf4fff63fb919ce52b2 | ILD         | Bacteria | Proteobacteria | Alphaproteobacteria | <i>Rhizobiales</i>           | <i>Xanthobacteraceae</i>    |                          |                                                               |
| bbf2fc899ad681cdaf0b9eb914c37cdd | ILD         | Bacteria | Proteobacteria | Alphaproteobacteria | <i>Rhizobiales</i>           | <i>Xanthobacteraceae</i>    |                          |                                                               |

|                                  |     |          |                |                     |                       |                     |                  |                               |
|----------------------------------|-----|----------|----------------|---------------------|-----------------------|---------------------|------------------|-------------------------------|
| ca0285f0e074a69bf90f7fb6763ca7cc | ILD | Bacteria | Proteobacteria | Alphaproteobacteria | Rhizobiales           | Rhizobiaceae        | Ochrobactrum     |                               |
| fc71ae7eda4a4430ce3474b70abc6a68 | ILD | Bacteria | Proteobacteria | Alphaproteobacteria | Rhizobiales           | Rhizobiaceae        | Mesorhizobium    |                               |
| c3dd369e13ccb4d1b19bc1aac91917ca | ILD | Bacteria | Proteobacteria | Gammaproteobacteria | Xanthomonadales       | Xanthomonadaceae    | Stenotrophomonas |                               |
| 0cf4a52b4562a6b2fb3404e74a2db527 | ILD | Bacteria | Proteobacteria | Gammaproteobacteria | Enterobacteriales     | Enterobacteriaceae  | Klebsiella       |                               |
| 584a15a8b8273021c7e3e7d07d3bc48d | ILD | Bacteria | Proteobacteria | Gammaproteobacteria | Betaproteobacteriales | Burkholderiaceae    | Ralstonia        |                               |
| 7f1495320cf00e9f81e455ea44145d2c | ILD | Bacteria | Proteobacteria | Gammaproteobacteria | Betaproteobacteriales | Burkholderiaceae    | Achromobacter    |                               |
| 616cd8134b106d6ed8e9cd6edce9a82a | ILD | Bacteria | Proteobacteria | Gammaproteobacteria | Pseudomonadales       | Pseudomonadaceae    | Pseudomonas      | Pseudomonas_aeruginosa        |
| 76ba84783044dc63a25709724d12740f | ILD | Bacteria | Firmicutes     | Bacilli             | Lactobacillales       | Streptococcaceae    | Streptococcus    |                               |
| 9adcea5ae4bfb4764d7ac5025de92c6d | ILD | Bacteria | Firmicutes     | Bacilli             | Lactobacillales       | Streptococcaceae    | Streptococcus    |                               |
| b15c7ffc9025f0458b58978326cd99b9 | ILD | Bacteria | Firmicutes     | Bacilli             | Lactobacillales       | Carnobacteriaceae   | Granulicatella   |                               |
| e7c5690166d106cd3e6f50e7a7f36562 | ILD | Bacteria | Firmicutes     | Negativicutes       | Selenomonadales       | Veillonellaceae     | Veillonella      |                               |
| 0421e9a57525fc3a89a7c9af9b4c6e4c | ILD | Bacteria | Bacteroidetes  | Bacteroidia         | Bacteroidales         | Porphyromonadaceae  | Porphyromonas    |                               |
| de287dd37785fcd58644cfeeabcd45f4 | ILD | Bacteria | Bacteroidetes  | Bacteroidia         | Sphingobacteriales    | Sphingobacteriaceae | Sphingobacterium | Sphingobacterium_spiritivorum |



**(B) Supplementary Figures**

**Supplementary Fig. S1.** Microbiota rarefaction curves showing lung microbiota diversity in ECOPD (red), ILD (green), stable COPD (blue), and sarcoidosis (orange) patient. Each curve shows the average number of species found in a given number of sampled sequences.

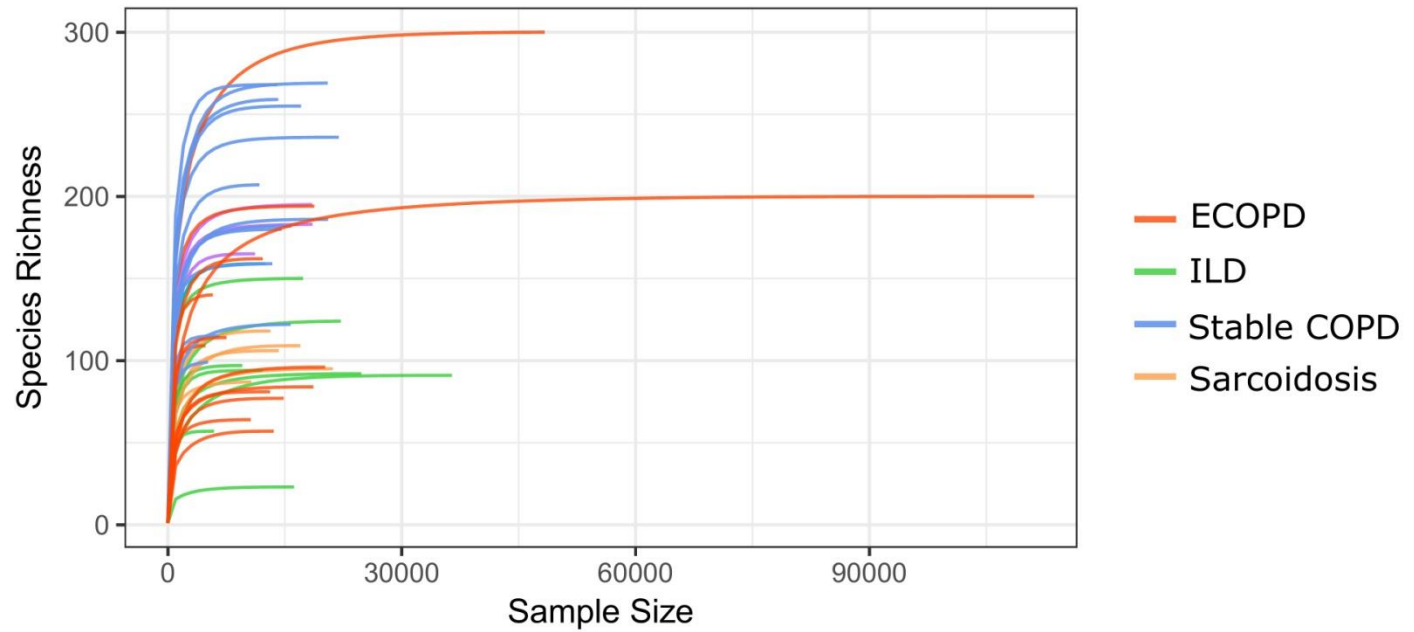

**Supplementary Fig. S2.** Principal Coordinates Analysis (PcoA) plots of weighted Unifrac distance metrics obtained from sequencing the 16s rRNA gene in lung samples. Axes represent the percentage of data explained by each coordinate dimension.

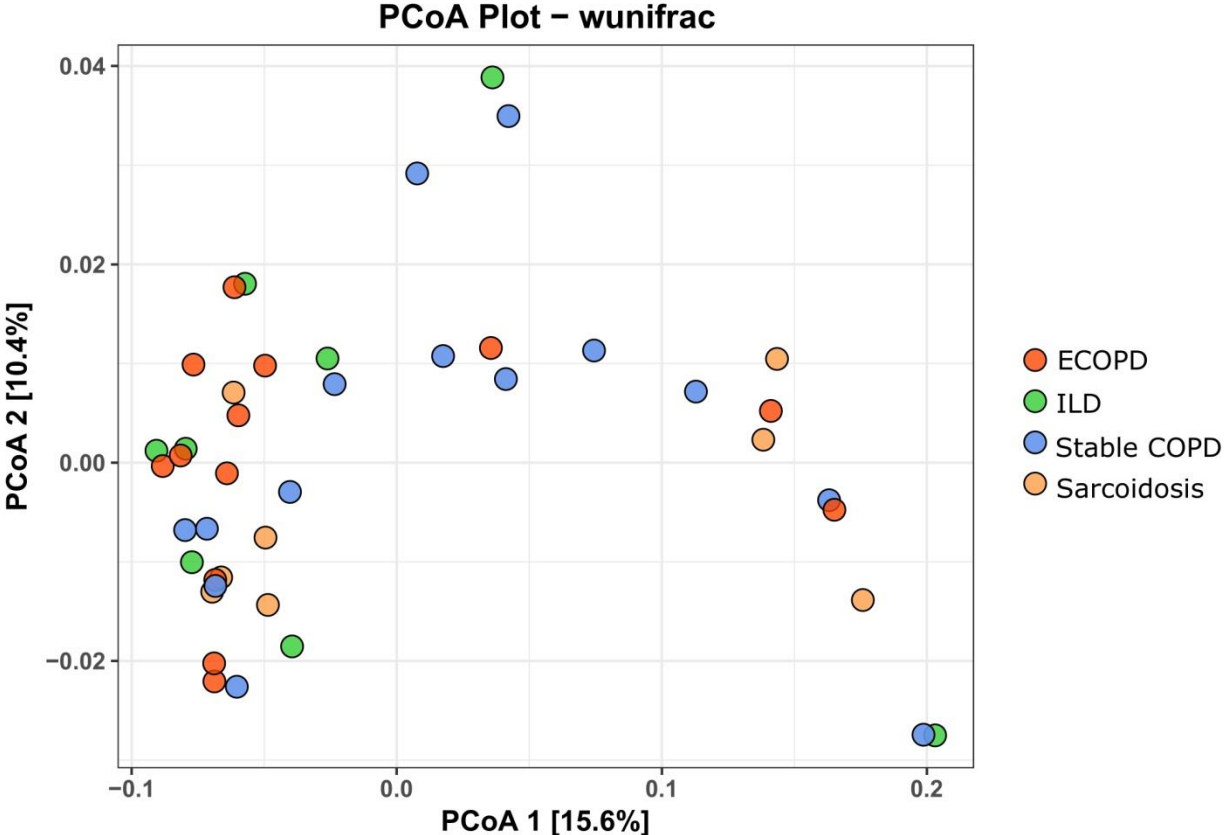

**Supplementary Fig. S3.** Core lung microbiota of ECOPD, ILD, stable COPD, and sarcoidosis. Venn diagram representation of the ASVs from the different disease groups. The ECOPD, ILD, stable COPD, and sarcoidosis presented 22, 18, 38, and 35 ASVs, respectively. Numbers inside indicate the ASVs shared by two or more groups. Numbers outside indicate the ASVs shared by one group.

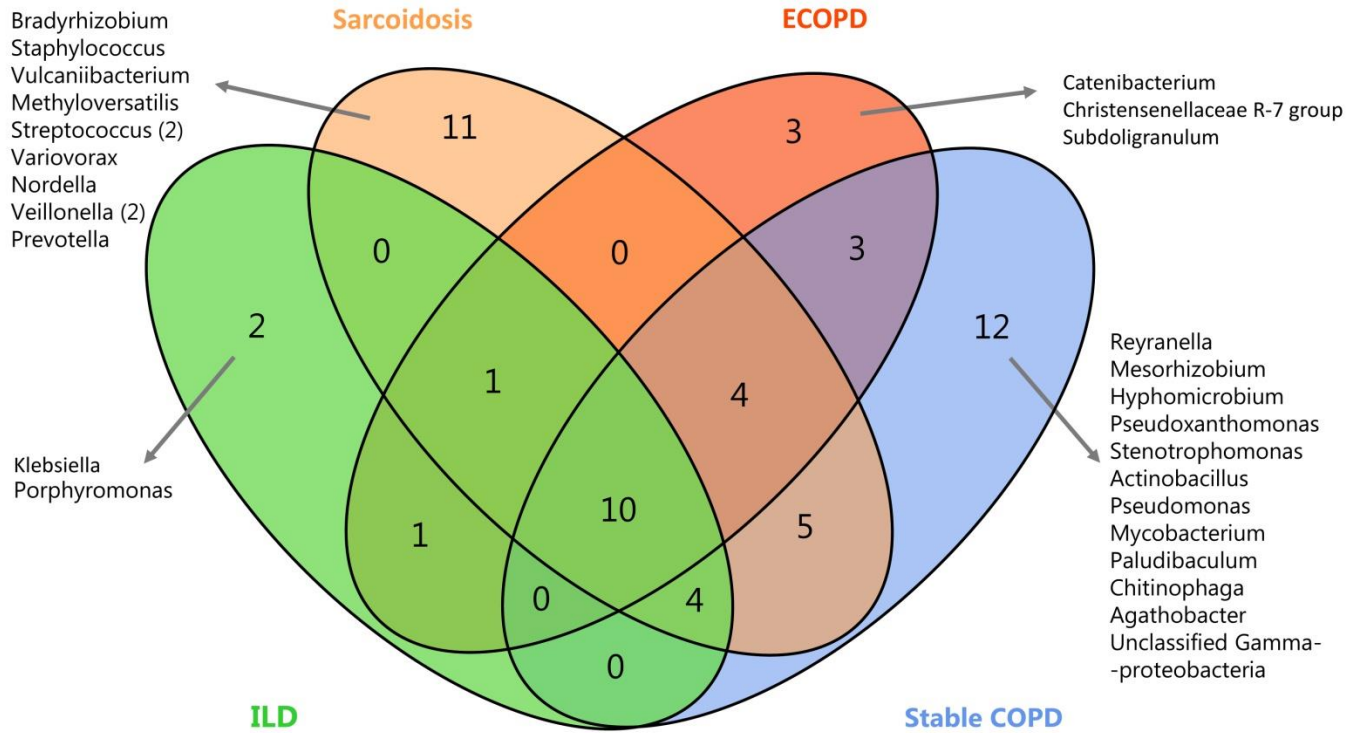

## **Supplementary Method**

### **Supplementary method SM1. Collection and processing of the negative controls.**

Negative control samples (n=3) were collected and processed to check for potential procedural contaminations. Microscopic examination was performed to check for the presence of any microbial contaminants. Additionally, samples were processed in parallel for metagenomic DNA isolation, as well as sequencing library preparation. Neither any microbe nor any DNA was observed in the negative control samples, so samples were not processed further for sequencing. Samples processing reagent control samples (n=2) were processed for sequencing; however no 16S rRNA gene specific sequencing reads were obtained. All samples were processed in a single run to avoid any batch specific sequencing biasness.
